1     **Perception of structurally distinct effectors by the integrated**  
2                     **WRKY domain of a plant immune receptor**

3     Mukhi N<sup>a</sup>, Brown H<sup>b</sup>, Gorenkin D<sup>a,c</sup>, Ding P<sup>b,d</sup>, Bentham AR<sup>a</sup>, Jones JDG<sup>b,#</sup>, Banfield MJ<sup>a,#</sup>  
4

5     <sup>a</sup> Department of Biochemistry and Metabolism, John Innes Centre, Norwich Research  
6     Park, Norwich, NR4 7UH, UK

7     <sup>b</sup> The Sainsbury Laboratory, University of East Anglia, Norwich Research Park,  
8     Norwich, NR4 7UH, UK

9     <sup>c</sup> Current address: School of Biological and Chemical Sciences, Queen Mary University  
10     of London, Mile End Road London, E1 4NS, UK

11    <sup>d</sup> Current address: Institute of Biology Leiden, Leiden University, Sylviusweg 72, Leiden  
12    2333 BE, The Netherlands

13    <sup>#</sup> Corresponding author: [jonathan.jones@tsl.ac.uk](mailto:jonathan.jones@tsl.ac.uk) and [mark.banfield@jic.ac.uk](mailto:mark.banfield@jic.ac.uk)

14

15    ORCID IDs:

16

17    Nitika Mukhi: 0000-0001-5717-7948

18    Hannah Brown: 0000-0003-1421-5785

19    Danylo Gorenkin: 0000-0001-7850-7563

20    Pingtao Ding: 0000-0002-3535-6053

21    Adam Bentham: 0000-0001-5906-0962

22    Jonathan JDG Jones: 0000-0002-4953-261X

23    Mark J Banfield: 0000-0001-8921-3835

24 **Abstract**

25 Plants use intracellular immune receptors (NLRs) to detect pathogen-derived effector  
26 proteins. The Arabidopsis NLR pair RRS1-R/RPS4 confers disease resistance to different  
27 bacterial pathogens by perceiving structurally distinct effectors AvrRps4 from  
28 *Pseudomonas syringae* pv. *pti* and PopP2 from *Ralstonia solanacearum* via an  
29 integrated WRKY domain in RRS1-R. How the WRKY domain of RRS1 (RRS1<sup>WRKY</sup>)  
30 perceives distinct classes of effector to initiate an immune response is unknown. We  
31 report here the crystal structure of the in planta processed C-terminal domain of AvrRps4  
32 (AvrRps4<sup>C</sup>) in complex with RRS1<sup>WRKY</sup>. Perception of AvrRps4<sup>C</sup> by RRS1<sup>WRKY</sup> is  
33 mediated by the  $\beta$ 2- $\beta$ 3 segment of RRS1<sup>WRKY</sup> that binds an electronegative patch on the  
34 surface of AvrRps4<sup>C</sup>. Structure-based mutations that disrupt AvrRps4<sup>C</sup>/RRS1<sup>WRKY</sup>  
35 interactions in vitro compromise RRS1/RPS4-dependent immune responses. We also  
36 show that AvrRps4<sup>C</sup> can associate with the WRKY domain of the related but distinct  
37 RRS1B/RPS4B NLR pair, and the DNA binding domain of *At*WRKY41, with similar  
38 binding affinities. This work demonstrates how integrated domains in plant NLRs can  
39 directly bind structurally distinct effectors to initiate immunity.

## 40 **Significance**

41 This study reveals a mechanism of effector recognition by a plant NLR immune receptor  
42 that carries an integrated domain (ID) which mimics an authentic pathogen effector  
43 target. An Arabidopsis immune receptor carrying RRS1 and RPS4 NLR proteins detects  
44 the *Pseudomonas syringae* pv. *ptsi* secreted effector AvrRps4 via a WRKY ID in RRS1.  
45 We used structural biology to reveal the mechanisms of AvrRps4/WRKY interaction and  
46 demonstrated that this binding is essential for effector recognition in planta. Our analysis  
47 revealed distinctive features of the WRKY ID that mediate the recognition of structurally  
48 distinct effectors from different bacterial pathogens. These insights could enable  
49 engineering NLRs with novel recognition specificities, and enhances our understanding  
50 of how effectors interact with host proteins.

## 51 **Introduction**

52

53 Plants co-evolve with their pathogens, resulting in extensive genetic variation in host  
54 immune receptor and pathogen virulence factor (effector) repertoires (1). To enable host  
55 colonization, pathogenic microbes deliver effector proteins into host cells that suppress  
56 host immune responses and elevate host susceptibility by manipulating host physiology  
57 (2, 3). Plants have evolved surveillance mechanisms to detect and then activate defenses  
58 that combat pathogens, and detect host-translocated effectors via nucleotide-binding  
59 leucine-rich repeat receptors (NLRs) (4). NLR genes are highly diverse, showing both  
60 copy number and presence/absence variation, and different alleles can exhibit distinct  
61 pathogen effector recognition specificities (5, 6). Plant NLR alleles usually recognize a  
62 specific effector (as described by the gene-for-gene model (7)). However, NLRs capable  
63 of responding to multiple effectors are known (5, 8, 9).

64 NLRs typically contain an N-terminal Toll/Interleukin-1 receptor/Resistance (TIR) or  
65 coiled coil (CC or CC<sub>R</sub>) domain, a central nucleotide binding (NB-ARC) domain, and a  
66 C-terminal leucine-rich repeat (LRR) domain (6). In addition to these canonical domains,  
67 some NLRs have evolved to carry integrated domains that mimic effector virulence  
68 targets and facilitate immune activation by directly binding effectors (10-15).  
69 Interestingly, integrated domain-containing NLRs (NLR-IDs) usually function with a  
70 paired helper NLR, which is required for immune signaling (16, 17).

71 The Arabidopsis NLR pair RRS1-R/RPS4 is a particularly interesting NLR-ID/NLR pair  
72 that confers recognition-dependent resistance to bacterial pathogens *Pseudomonas*  
73 *syringae* and *Ralstonia solanacearum*, and also resistance to a fungal pathogen  
74 (*Colletotrichum higginsianum*) where the effector is unknown (18-21). RRS1-R contains  
75 an integrated WRKY domain near its C-terminus (RRS1<sup>WRKY</sup>), which interacts with two  
76 structurally distinct type III secreted bacterial effectors – AvrRps4 from *Pseudomonas*  
77 *syringae* pv. *pisi* and PopP2 from *Ralstonia solanacearum* (13, 14, 22, 23). The  
78 RRS1<sup>WRKY</sup> domain may mimic WRKY transcription factors, the virulence-associated  
79 targets of AvrRps4 and PopP2 to detect the effectors for immune recognition (13). Two



80 alleles of RRS1 have been identified that differ in the length of the C-terminal extension  
81 after the WRKY domain. RRS1-R from accession Ws-2 has a 101 amino acid C-terminal  
82 extension beyond the end of the WRKY domain, and can perceive AvrRps4 and PopP2,  
83 while RRS1-S from Col-0, which perceives AvrRps4 but not PopP2, is likely a derived  
84 allele with a premature stop codon, and has only an 18 amino acid C-terminal extension  
85 (24). Most Arabidopsis ecotypes also carry a paralogous and genetically linked  
86 RRS1B/RPS4B NLR pair, which only perceives AvrRps4 (25). RRS1B/RPS4B share a  
87 similar domain architecture with RRS1/RPS4, including 60% sequence identity in the  
88 integrated WRKY domain.

89 AvrRps4 is proteolytically processed in planta to produce a 133-amino-acid N-terminal  
90 fragment (AvrRps4<sup>N</sup>) and an 88-amino-acid C-terminal fragment (AvrRps4<sup>C</sup>) (26, 27).  
91 Previous studies have highlighted the role of AvrRps4<sup>C</sup> in triggering RRS1/RPS4-  
92 dependent immune responses (26, 27). AvrRps4<sup>N</sup> has been reported to potentiate immune  
93 signaling from AvrRps4<sup>C</sup> (28, 29). PopP2 is sequence and structurally distinct from  
94 AvrRps4 and has an acetyltransferase activity that is likely related to its role in virulence.  
95 The structural basis of PopP2 perception by RRS1<sup>WRKY</sup> has been determined (30), but  
96 how RRS1<sup>WRKY</sup> binds AvrRps4<sup>C</sup> and whether this is via a shared or different interface to  
97 PopP2, is unknown.

98 Here, we determined the structural basis of AvrRps4<sup>C</sup> recognition by the RRS1/RPS4  
99 immune pair. The recognition of AvrRps4<sup>C</sup> is mediated by the  $\beta$ 2- $\beta$ 3 segment of  
100 RRS1<sup>WRKY</sup>, the same region used to bind PopP2. This segment interacts with surface-  
101 exposed acidic residues of AvrRps4<sup>C</sup>. Structure-informed mutagenesis at the  
102 AvrRps4<sup>C</sup>/RRS1<sup>WRKY</sup> interface identifies AvrRps4 residues required for protein/protein  
103 interactions in vitro and in planta, and AvrRps4 perception and immune responses.  
104 Residues mediating the interaction of AvrRps4<sup>C</sup> and RRS1<sup>WRKY</sup> are conserved in both the  
105 RRS1B<sup>WRKY</sup> and the DNA binding domain of WRKY transcription factors, and AvrRps4<sup>C</sup>  
106 mutants that prevent interaction with RRS1<sup>WRKY</sup> also disrupt binding to AtWRKY41. This  
107 supports the hypothesis that the RRS1<sup>WRKY</sup> mimics host WRKY transcription factors via a  
108 shared effector binding mechanism.

## 109 **Results**

110

### 111 **AvrRps4<sup>C</sup> interacts with the integrated WRKY domain of RRS1 in vitro**

112 To investigate how AvrRps4<sup>C</sup> interacts with the RRS1<sup>WRKY</sup> domain, constructs  
113 comprising residues 134-221 of AvrRps4<sup>C</sup> (the in planta processed C-terminal fragment)  
114 and residues 1194-1273 of RRS1-R (corresponding to the RRS1<sup>WRKY</sup> domain) were  
115 separately expressed in *E. coli* and proteins purified (*SI Materials and Methods*). We  
116 qualitatively assessed the interaction of purified AvrRps4<sup>C</sup> with RRS1<sup>WRKY</sup> using  
117 analytical gel filtration chromatography. Individually, the proteins displayed well-  
118 separated elution profiles. RRS1<sup>WRKY</sup> eluted at a volume ( $V_e$ ) of 14.9 mL and AvrRps4<sup>C</sup> at  
119 a  $V_e$  of 12.1 mL (Fig. 1A). Following incubation of a 1:1 molar ratio of the proteins we  
120 observe a new elution peak with an earlier  $V_e$  of 11.8 mL, and a lack of absorption peaks  
121 for the separate proteins (Fig. 1A). This demonstrates complex formation in vitro and  
122 suggests a 1:1 stoichiometry in the AvrRps4<sup>C</sup>/RRS1<sup>WRKY</sup> complex.

123 We then determined the binding affinities of the interaction using isothermal titration  
124 calorimetry (ITC). Titration of AvrRps4<sup>C</sup> into a solution of RRS1<sup>WRKY</sup> resulted in an  
125 exothermic binding isotherm with a fitted dissociation equilibrium constant ( $K_d$ ) of 0.103  
126  $\mu\text{M}$  (Fig. 1B) and stoichiometry of 1:1. The thermodynamic parameters of the interaction  
127 are given in Table 1. As RRS1<sup>WRKY</sup> maybe a mimic of WRKY transcription factors, we  
128 explored the binding kinetics of AvrRps4<sup>C</sup> with *At*WRKY41 and *At*WRKY70 by ITC  
129 (previous reports have shown that AvrRps4 interacts with these proteins in yeast two-  
130 hybrid and by in planta co-immunoprecipitation (13, 31)). We chose *At*WRKY41 for  
131 further study as this protein expressed and purified stably from *E. coli*. AvrRps4<sup>C</sup>  
132 interacted with *At*WRKY41 with a  $K_d$  of 0.02  $\mu\text{M}$ , and similar thermodynamic  
133 parameters as RRS1<sup>WRKY</sup> (Fig. S1, Table 1).

### 134 **Crystal structure of the AvrRps4<sup>C</sup>/RRS1<sup>WRKY</sup> complex**

135 To reveal the molecular basis of AvrRps4<sup>C</sup> and RRS1<sup>WRKY</sup> interaction, we co-expressed  
136 the proteins in *E. coli*, purified the complex and obtained crystals that diffracted to 2.65 Å

137 resolution at the Diamond Light Source, UK (see *SI Materials and Methods*). The crystal  
138 structure of the AvrRps4<sup>C</sup>/RRS1<sup>WRKY</sup> complex was solved by molecular replacement  
139 using the structure of RRS1<sup>WRKY</sup> (from the PopP2/RRS1<sup>WRKY</sup> complex PDB ID: 5W3X)  
140 and AvrRps4<sup>C</sup> (PDB ID: 4B6X) as models (see *SI Materials and Methods*). X-ray data  
141 collection, refinement and validation statistics are shown in Table 2.

142 The structure comprises a 1:1 complex of AvrRps4<sup>C</sup> and RRS1<sup>WRKY</sup> (Fig. 2A), consistent  
143 with the stoichiometry suggested by analytical gel filtration and from ITC. Overall,  
144 AvrRps4<sup>C</sup> adopts the same antiparallel  $\alpha$ -helical coiled coil structure in both free (PDB  
145 ID: 4B6X (27)) and complexed forms, with an RMSD of 0.66 Å over 59 C $\alpha$  atoms (Fig  
146 S2A). Also, RRS1<sup>WRKY</sup> adopts a conventional WRKY domain fold (RMSD of 2.03 Å  
147 over 61 C $\alpha$  atoms compared to *At*WRKY1, PDB ID: 2AYD (32)) comprising a four-  
148 stranded antiparallel  $\beta$ -sheet ( $\beta$ 2 to  $\beta$ 5) stabilized by a zinc ion (C<sub>2</sub>H<sub>2</sub> type). Comparison  
149 of RRS1<sup>WRKY</sup> in the AvrRps4<sup>C</sup>/RRS1<sup>WRKY</sup> and PopP2/RRS1<sup>WRKY</sup> complex (PDB ID:  
150 5W3X) structures reveals high conformational similarity, with an RMSD of 1.81 Å over  
151 64 C $\alpha$  atoms. The characteristic WRKY sequence signature motif ‘WRKYGQK’ maps to  
152 the  $\beta$ 2 strand of RRS1<sup>WRKY</sup> and is directly involved in contacting AvrRps4<sup>C</sup> (Fig. 2B, Fig.  
153 S2B). The same surface, including the  $\beta$ 2- $\beta$ 3 strands of RRS1<sup>WRKY</sup>, forms contacts with  
154 PopP2 in the structure of the PopP2/RRS1<sup>WRKY</sup> complex (30) (Fig. S3) and mutants at this  
155 surface showed it to be essential for PopP2 recognition.

### 156 **The AvrRps4<sup>C</sup>/RRS1<sup>WRKY</sup> binding interface is dominated by electrostatic and polar** 157 **interactions**

158 The total interface area buried in the AvrRps4<sup>C</sup>/RRS1<sup>WRKY</sup> complex is 591.8 Å<sup>2</sup>,  
159 encompassing 12.3 % (589.7 Å<sup>2</sup>) and 11.9 % (593.9 Å<sup>2</sup>) of the total accessible surface  
160 areas of the effector and integrated domain respectively (as calculated by PDBePISA  
161 (33), full details are given in Table 3). The binding interface between AvrRps4<sup>C</sup> and  
162 RRS1<sup>WRKY</sup> is largely formed by residues from the  $\beta$ 2- $\beta$ 3 strand of RRS1<sup>WRKY</sup>, which  
163 present a positive surface patch that interacts with acidic residues on the surface of  
164 AvrRps4<sup>C</sup> (Fig. 2A, Fig. S2B). The interaction between the  $\beta$ 2 segment of RRS1<sup>WRKY</sup>,

165 which harbors the WRK<sup>1</sup>YGQK<sup>2</sup> motif, and AvrRps4<sup>C</sup>, includes hydrogen bond and/or  
166 salt bridge interactions involving Tyr1218 and Lys(K<sup>2</sup>)1221 of RRS1<sup>WRKY</sup> and AvrRps4  
167 Glu175, Glu187 and Asn171. Notably, the side chain of RRS1<sup>WRKY</sup> Lys1221 protrudes  
168 into an acidic cleft on the surface of AvrRps4<sup>C</sup> to contact the side chains of both AvrRps4  
169 Glu175 and Glu187 (Fig. 2B,C). The OH atom of RRS1<sup>WRKY</sup> Tyr1218 forms a hydrogen  
170 bond with the ND2 atom of AvrRps4 Asn171 (Fig. 2B,C). Additional intermolecular  
171 contacts are formed by the  $\beta$ 2- $\beta$ 3 loop of RRS1<sup>WRKY</sup> involving the backbone carbonyl  
172 oxygen and nitrogen of Asp1222, which form hydrogen bonds with the side chains of  
173 AvrRps4 Asn190 and Gln194. The complex between AvrRps4<sup>C</sup>/RRS1<sup>WRKY</sup> is further  
174 stabilized by the  $\beta$ 3 strand of RRS1<sup>WRKY</sup> that forms hydrogen bonds and salt bridge  
175 interactions via side chains of RRS1<sup>WRKY</sup> Arg1230, Tyr1232, Arg1234 to AvrRps4  
176 Glu175 and Asp164 (Fig. 2B,C). A detailed interaction summary is provided in Table 4.

#### 177 **Structure-based mutations in AvrRps4<sup>C</sup> perturb binding to RRS1<sup>WRKY</sup> in vitro**

178 To evaluate the contribution of residues at the AvrRps4<sup>C</sup>/RRS1<sup>WRKY</sup> interface to complex  
179 formation in vitro, we generated six structure-guided mutants in AvrRps4<sup>C</sup> (native amino  
180 acid to Ala) and tested the effect on protein interactions by ITC. Each AvrRps4<sup>C</sup> mutant  
181 was purified from *E. coli* under the same conditions as for the wild-type protein, and  
182 proper folding evaluated by circular dichroism (CD) spectroscopy (Fig. S4). ITC  
183 titrations were carried out as for the wild-type interactions. Individual ITC isotherms are  
184 shown in Fig. 3, and the thermodynamic parameters of the interactions are shown in  
185 Table 1. We found that mutating AvrRps4 residues Asp164, Glu175, Glu187, and double  
186 mutant Glu175/Glu187, essentially abolished complex formation in vitro (Fig. 3).  
187 Mutations in residues Asn171 and Gln194 retained binding to RRS1<sup>WRKY</sup>, with  
188 Asn171Ala displaying wild-type levels and Gln194Ala showing an  $\sim$ 7-fold reduction in  
189 affinity. Besides structure-guided mutants, we also tested binding of an AvrRps4  
190 KR<sup>26</sup>VY/AAAA mutant, carrying mutations in the N-terminal KR<sup>26</sup>VY motif (26), with  
191 RRS1<sup>WRKY</sup>. Unlike most interface mutants, AvrRps4 KR<sup>26</sup>VY/AAAA retained wild-type-  
192 like binding affinity with RRS1<sup>WRKY</sup> (Fig. 3).

193 Since AvrRps4<sup>C</sup> associates with RRS1<sup>WRKY</sup> and AtWRKY41 with similar binding  
194 affinities (Fig. S1), we tested the impact of the AvrRps4 Glu175/Glu187 double mutant  
195 on the binding to AtWRKY41. We found that this mutant also abolishes interaction with  
196 AtWRKY41, suggesting the same AvrRps4 binding interface is shared with different  
197 WRKY proteins (Fig. S1).

### 198 **Structure-based mutations in AvrRps4 prevent RRS1/RPS4 mediated cell death in** 199 ***Nicotiana tabacum***

200 To validate the biological relevance of the AvrRps4<sup>C</sup>/RRS1<sup>WRKY</sup> interface observed in the  
201 crystal structure, we tested the effect of the AvrRps4<sup>C</sup> interface mutants above on RRS1-  
202 R/RPS4 mediated immunity by monitoring the cell-death response in *N. tabacum*.  
203 *Agrobacterium*-mediated transient expression of wild-type AvrRps4 triggers a  
204 hypersensitive cell death response (HR) 5 days post infiltration (dpi) when co-expressed  
205 with RRS1-R/RPS4 (Fig. 4A). The previously characterized inactive AvrRps4  
206 KRKY/AAAA mutant (26, 27) was used as a negative control. We found that AvrRps4  
207 mutations at positions Asp164, Glu175 and Glu187, and the double mutant  
208 Glu175/Glu187, prevented RRS1-R/RPS4-dependent cell death responses (Fig. 4A).  
209 Interestingly, the Asn171Ala mutation displayed wild-type like cell death-inducing  
210 activity, and Gln194Ala consistently exhibited weaker death. Expression of all mutants  
211 was confirmed by immunoblotting (Fig. 4B). In addition to RRS1-R/RPS4, we also  
212 explored the effect of AvrRps4 structure-based mutations on RRS1-S/RPS4-dependent  
213 cell death in *N. tabacum* (Fig. S5A). We found that AvrRps4 variants elicited similar  
214 immune responses when transiently co-expressed with RRS1-S/RPS4 or RRS1-R/RPS4.

### 215 **Loss of cell death in *N. tabacum* correlates with the loss of binding to RRS1<sup>WRKY</sup> in** 216 ***vivo***

217 To determine whether loss of RRS1-R/RPS4-mediated HR in transient assays correlates  
218 with the loss of AvrRps4 binding to RRS1<sup>WRKY</sup> *in vivo*, we performed co-  
219 immunoprecipitation (co-IP) assays using full-length C-terminal 4xmyc tagged AvrRps4  
220 constructs and C-terminal 6xHis/3xFLAG-tagged constructs of RRS1-R<sup>WRKY+83</sup> (RRS1-

221 R<sup>WRKY</sup> with an additional 83 amino acid at the C-terminal end, which enhances the  
222 stability of RRS1<sup>WRKY</sup> when expressed in planta). Wild-type AvrRps4 associates with  
223 RRS1-R<sup>WRKY+83</sup> in its in planta processed form (Fig. 4B). Consistent with the cell death  
224 phenotype, no association between AvrRps4 mutants Asp164Ala (D164A), Glu175Ala  
225 (E175A), Glu187Ala (E187A) or Glu175/187Ala (EE/AA) and RRS1<sup>WRKY+83</sup> was  
226 detected (Fig. 4B). Further, we observed wild-type levels of association of AvrRps4  
227 Asn171Ala (N171A) with RRS1<sup>WRKY+83</sup>, while AvrRps4 Gln194Ala (Q194A) appears to  
228 only co-IP weakly. The AvrRps4 KRKY/AAAA mutant displayed wild-type like binding  
229 affinity towards RRS1<sup>WRKY+83</sup>, as observed previously (27).

### 230 **Structure-guided mutations in AvrRps4 prevent HR in *A. thaliana***

231 Next, we investigated the impact of AvrRps4 structure-guided mutations on the activation  
232 of RRS1-R/RPS4-dependent immune responses using HR assays in *A. thaliana*.  
233 Constructs carrying full-length AvrRps4 wild-type and mutants, flanked by 126 bp native  
234 AvrRps4 promoter, were delivered into plant cells by infiltration using the Pf0-EtHAN  
235 (*Pseudomonas fluorescens* Effector-to-Host Analyzer, hence Pf0) system (34). HR assays  
236 used Arabidopsis ecotype Ws-2 (encoding RRS1-R/RPS4 and RPS4B/RRS1B) and Ws-2  
237 *rrs1-1/rps4-21/rps4b-1* (RRS1-R/RPS4/RPS4B triple knockout) lines and scored at 20  
238 hpi (hours post infiltration). Pf0 carrying wild-type AvrRps4 triggered HR in Ws-2, but  
239 not in Ws-2 *rrs1-1/rps4-21/rps4b-1*, as previously reported (13, 27). AvrRps4  
240 KRKY/AAAA, an HR inactive mutant, was used as a negative control (27). The  
241 structure-guided mutants AvrRps4 D164A, E175A, E187A and EE/AA all showed a  
242 complete loss of HR in Ws-2, with AvrRps4 Q194A showing a weaker HR and N171A a  
243 wild-type-like phenotype (Fig. 5A). None of the AvrRps4 variants triggered HR in Ws-2  
244 *rrs1-1/rps4-21/rps4b-1* (Fig. 5A).

245 In addition to Ws-2, we also performed a parallel set of experiments in Arabidopsis  
246 ecotype Col-0 (which encodes the RRS1-S allele) and the Col-0 *rrs1-3/rrs1b-1* (RRS1-  
247 S/RRS1B double knockout) line. Overall, we observed a weaker HR towards AvrRps4  
248 wild-type and mutants in Col-0 in comparison to Ws-2. Nevertheless, a similar pattern of  
249 HR phenotypes were observed in Col-0 compared to Ws-2, and none of the AvrRps4



250 variants triggered HR in the Col-0 *rrs1-3/rrs1b-1* line (Fig. S5B). The pattern of HR  
251 phenotypes conferred by the AvrRps4 interface mutants further validates the  
252 AvrRps4<sup>C</sup>/RRS1<sup>WRKY</sup> structure and the role of these residues in recognition of AvrRps4  
253 by the RRS1/RPS4 receptor pair.

#### 254 **Loss of HR correlates with bacterial growth in RRS1/RPS4-containing *A. thaliana***

255 Having demonstrated the role of AvrRps4 interface residues in effector-triggered HR in  
256 *A. thaliana*, we next investigated their effects on bacterial growth. We performed  
257 bacterial growth assays on Arabidopsis ecotypes Ws-2, Col-0, Ws-2 *rrs1-1/rps4-*  
258 *21/rps4b-1* and Col-0 *rrs1-3/rrs1b-1* (as detailed in the previous section) using *P.*  
259 *syringae* pv. *tomato* (*Pto*) DC3000 strain carrying AvrRps4 wild-type or each mutant.  
260 Since both the single mutants AvrRps4 E175A and E187A displayed the same impaired  
261 HR as the double AvrRps4 EE/AA mutant in our previous assays, we focused on  
262 AvrRps4 EE/AA mutant only for this assay. Bacterial growth was scored at three days  
263 post-infection (dpi). *Pto* DC3000 carrying wild-type AvrRps4 displayed reduced growth  
264 on Ws-2 when compared to the mutant background (Ws-2 *rrs1-1/rps4-21/rps4b-1*),  
265 presumably due to the activation of RRS1-R/RPS4-dependent immunity (Fig. 5B). The  
266 effector mutants AvrRps4 D164A, EE/AA, KRYY/AAAA, which displayed a complete  
267 loss of HR in Ws-2, show a severe or complete lack of restriction of bacterial growth in  
268 Ws-2 (Fig. 5B). *Pto* DC3000:AvrRps4 Q194A and *Pto* DC3000:AvrRps4 N171A  
269 showed reduced bacterial growth (but not full restriction) when compared to wild-type  
270 AvrRps4, even though they displayed a similar cell death phenotype in *N. tabacum*  
271 (albeit weaker for AvrRps4 Q194A) and HR in Arabidopsis (Fig. 4A, 5A). All the *Pto*  
272 DC3000:AvrRps4 variants tested displayed indistinguishable bacterial growth in RRS1-  
273 R/RPS4 loss of function line (Fig. 5B). Finally, all the *Pto* DC3000:AvrRps4 variants  
274 displayed similar bacterial growth profiles in Col-0 and Col-0 *rrs1-3/rrs1b-1* line when  
275 compared to Ws-2 and Ws-2 *rrs1-1/rps4-21/rps4b-1* (Fig. S5C).

#### 276 **The RRS1B/RPS4B immune receptor pair displays similar recognition specificities** 277 **towards AvrRps4 variants as RRS1/RPS4**

278 In addition to RRS1/RPS4, the RRS1B/RPS4B pair can confer recognition of AvrRps4 in  
279 Arabidopsis (25). Sequence alignment reveals an overall 60% amino acid identity of the  
280 integrated WRKY domains from RRS1 and RRS1B, with the ‘WRKYGQK’ motif and  
281 all residues interfacing with AvrRps4<sup>C</sup> conserved (Fig. S6). To explore AvrRps4  
282 recognition by RRS1B/RPS4B, we performed ITC titrations of RRS1B<sup>WRKY</sup> with wild-  
283 type AvrRps4<sup>C</sup> in vitro. In comparison to RRS1<sup>WRKY</sup>, RRS1B<sup>WRKY</sup> binds ~3-fold more  
284 weakly to AvrRps4<sup>C</sup> (Fig. S6). When comparing the binding kinetics to the strength of  
285 immune responses in planta, we observed a weaker RRS1B/RPS4B-dependent HR to  
286 AvrRps4 compared to RRS1/RPS4. Nonetheless, both NLR pairs displayed a similar  
287 profile of immune responses towards the AvrRps4 structure-guided mutants in transient  
288 cell death assays and in *A. thaliana* HR assays (Fig. S6).



## 289 Discussion

290 Despite recent advances, structural knowledge of how diverse integrated domains in plant  
291 NLRs perceive pathogen effectors is limited. Here, we investigated how the integrated  
292 WRKY domain of the Arabidopsis NLR RRS1 binds to the *Pseudomonas* effector  
293 AvrRps4, and how this underpins RRS1/RPS4-dependent immunity in planta. Further,  
294 through this work, we gained insights into interfaces in the RRS1<sup>WRKY</sup> domain that are  
295 crucial for perception of two structurally unrelated effectors from distinct bacterial  
296 pathogens, which may have implications for NLR integrated domain engineering.

297 Transcriptional reprogramming upon NLR activation is well established as an early  
298 immune response in plants (35-37), and direct interactions between NLRs and  
299 transcription factors have been reported (38-42). WRKY transcription factors are  
300 important molecular players in the regulation of plant growth and development, abiotic  
301 and biotic stresses (43-45). Typically, WRKY transcription factors target genes by  
302 binding W-box DNA in promoters, via a signature amino acid motif ‘WRKYGQK’, to  
303 either promote or repress transcription (46-49). As WRKY TFs play an important role in  
304 plant immunity, it is unsurprising that they are often found as integrated domains in NLR  
305 immune receptors (50), supporting the hypothesis that pathogen effectors enhance  
306 virulence by targeting WRKY transcription factors. Therefore, understanding how  
307 effectors bind to WRKY integrated domains may inform how effector/WRKY binding  
308 promotes disease. The structure of the AvrRps4<sup>C</sup>/RRS1<sup>WRKY</sup> complex reveals that the  
309 effector directly interacts with the DNA binding ‘WRKYGQK’ motif, likely rendering it  
310 unavailable for binding to DNA. AvrRps4<sup>C</sup> binds to *At*WRKY41 with similar  
311 thermodynamic parameters to RRS1<sup>WRKY</sup>, and interface mutants that prevent AvrRps4<sup>C</sup>  
312 interaction with RRS1<sup>WRKY</sup> prevent interaction with *At*WRKY41, supporting the  
313 hypothesis that AvrRps4<sup>C</sup> binds different WRKYs via a similar interface. Therefore, we  
314 speculate that AvrRps4 binds WRKY transcription factors to sterically block their  
315 binding to DNA, promoting virulence. WRKY domain residues interacting with  
316 AvrRps4<sup>C</sup> are well conserved in these transcription factors (Fig. S7), suggesting that  
317 AvrRps4 could target multiple WRKY domains to promote virulence. In addition to

318 WRKY TFs, a recent publication suggests AvrRps4 can interact with BTS domains to  
319 affect pathogen colonization (51). Understanding whether these functions are related  
320 requires further investigation.

321 Comparing the AvrRps4<sup>C</sup>/RRS1<sup>WRKY</sup> structure with that of the PopP2/RRS1<sup>WRKY</sup> (30)  
322 reveals an overlapping binding site for the effectors, primarily mediated by the  $\beta$ 2- $\beta$ 3  
323 segment of WRKY domain. The second lysine of the 'WRK<sup>1</sup>YGQK<sup>2</sup>' motif (K<sup>2</sup>) is  
324 acetylated by PopP2, abolishing the affinity of WRKY domain for W-box DNA (13, 14,  
325 30). Intriguingly, acetylation of K<sup>2</sup> lysine by PopP2 abolished the association of AvrRps4  
326 with RRS1<sup>WRKY</sup> (13), highlighting the important role of this interface in mediating the  
327 association of RRS1<sup>WRKY</sup> with both effectors. It also highlights the likely shared role of  
328 the effectors in preventing interaction of WRKY domains with DNA as their virulence  
329 activity, either via enzymatic modification or steric blocking.

330 Studies with the NLR pair Pik from rice have shown that the strength of effector binding  
331 to integrated domains in vitro can correlate with immune responses in planta (52-54). Of  
332 the AvrRps4 mutants we tested to validate the RRS1<sup>WRKY</sup> interface, all except N171A and  
333 Q194A prevented binding in vitro (by ITC) and in planta (by co-IP), and these did not  
334 give cell death in *Nicotiana* species when co-expressed with either RRS1-R/RPS4 or  
335 RRS1-S/RPS4. Further, they did not give HR or restrict bacterial growth in *Arabidopsis*  
336 Ws-2 or Col-0 ecotypes (except for a partial restriction of bacterial growth for the D164A  
337 mutation in the Col-0 background). The N171A mutant retained the same level of binding  
338 as wild-type in vitro, and displayed the same in planta phenotypes, although restriction of  
339 bacterial growth in *Arabidopsis* was reduced compared to wild-type in both Ws-2 and  
340 Col-0 ecotypes. Finally, the Q194A mutant showed a reduced binding in vitro (~7-fold  
341 compared to wild-type) but maintained an HR in *Arabidopsis* as well as displaying a  
342 restriction of bacterial growth in *Arabidopsis*, albeit reduced compared to wild-type.  
343 Interestingly, this mutant consistently showed a qualitative reduction in the intensity of  
344 cell death in *Nicotiana*. Taken together, these AvrRps4 mutations validate the complex  
345 with RRS1<sup>WRKY</sup> in that they prevent interaction in vitro and in planta, but they are not  
346 sufficient to determine whether strength of binding in vitro can directly correlate with in

347 planta phenotypes. Further studies, including additional mutants, will be required to study  
348 this in the RRS1/RPS4 system.

349 Structural studies of singleton NLRs have shown that interactions between effectors and  
350 multiple domains within an NLR can be essential for activation (55-58). It is yet to be  
351 established whether this is also the case for effector perception involving paired NLRs  
352 with integrated domains, although the rice blast pathogen effector AVR-Pia  
353 immunoprecipitates with its sensor NLR Pia-2 (RGA5) when the integrated HMA domain  
354 has been deleted. However, this interaction does not promote immune responses in planta  
355 (59). Although unresolved in the structure of AvrRps4<sup>C</sup> alone, or in complex with  
356 RRS1<sup>WRKY</sup>, the N-terminal KR<sup>VY</sup> motif is known to be required for both the virulence  
357 activity of the effector and its perception by RRS1/RPS4 (26, 27). Here, we verified that  
358 the quadruple mutant AvrRps4 KR<sup>VY</sup>/AAAA retains interaction with RRS1<sup>WRKY</sup> at wild-  
359 type levels in vitro and in vivo, but did not trigger RRS1/RPS4-dependent responses in  
360 our in planta assays. This suggests that while binding of AvrRps4 to the RRS1<sup>WRKY</sup>  
361 domain is essential for immune activation, an additional interaction mediated by the N-  
362 terminal region of the effector to a region of RRS1 and/or RPS4 outside this domain is  
363 also required for initiation of defence. Further studies are required to determine how  
364 additional receptor domains outside of integrated domains in NLR-IDs contribute to  
365 receptor function.

366 The Arabidopsis NLR pair RRS1B/RPS4B perceives AvrRps4, but not PopP2 (25).  
367 Phylogenetically, the RRS1 WRKY belongs to Group III of the WRKY superfamily,  
368 whereas RRS1B WRKY is grouped into Group IIe (14, 25, 49). Here we found that  
369 AvrRps4<sup>C</sup> binds the RRS1B<sup>WRKY</sup> with three-fold lower affinity and RRS1B/RPS4B shows  
370 a similar pattern of recognition specificity in planta but with reduced phenotypes  
371 compared to RRS1/RPS4. A full investigation addressing why AvrRps4 shows  
372 differential interaction strength and phenotypes between RRS1 and RRS1B is beyond the  
373 scope of this work, but will be a direction for future research.

374 The unique ability of RRS1/RPS4 to perceive two effectors that differ both in sequence  
375 and structure, via the same integrated domain, highlights the potential for engineering of

376 sensor NLRs to recognize diverse effectors. Recently, the range of rice blast pathogen  
377 effectors recognized by the integrated HMA domain of Pia-2 (RGA5) has been expanded  
378 by molecular engineering (59). However, this expanded recognition was towards  
379 structurally related effectors and may not be via a shared interface. Further, although cell  
380 death responses were observed in *N. benthamiana*, the engineered NLR was not able to  
381 deliver an expanded disease resistance profile in transgenic rice. This suggests we still  
382 require a better understanding of how NLR-IDs interact with effectors, and their partner  
383 helper NLRs, to enable bespoke engineering of disease resistance.

## 384 **Materials and Methods**

### 385 **Gene cloning**

386 For in vitro studies, the gene fragments of AvrRps4<sup>C</sup> (Gly134–Gln221), RRS1<sup>WRKY</sup>  
387 (Ser1194–Thr1273), RRS1B<sup>WRKY</sup> (Asn1164–Thr1241), AtWRKY41 (Thr125–Ile204) were  
388 cloned in various pOPIN expression vectors using in-fusion cloning strategy as described  
389 in the *SI Materials and Methods*.

390 For transient assays in *N. tabacum* and *N. benthamiana*, domesticated genomic fragments  
391 encoding RRS1-R, RRS1-S, RRS1B, RPS4, RPS4B were cloned into binary vector  
392 pICSL86977 under a 35S (CaMV) promoter with C-terminal 6xHis/3xFLAG-tag using  
393 Golden Gate assembly method as described in (24). Similar cloning techniques were used  
394 to generate constructs expressing RRS1<sup>WRKY+83</sup>. Full length AvrRps4 (*P. syringae* pv. pisi)  
395 was PCR-amplified from published constructs (13, 24, 27) and assembled with a C-  
396 terminal 4xmyc-tag in binary vector pICSL86977 under the control of 35S (CaMV)  
397 promoter using Golden Gate assembly method. DNA encoding each mutation was  
398 synthesised and cloned into pICSL86977 as described above.

399 For HR and bacterial growth assays in *A. thaliana*, full-length AvrRps4 and variants were  
400 cloned into a golden-gate compatible pEDV3 vector with C-terminal 4xmyc-tag.

### 401 **Protein Production and Purification**

402 Plasmids expressing in planta processed C-terminal fragment of AvrRps4 (AvrRps4<sup>C</sup>)  
403 and integrated WRKY domain of RRS1 (RRS1<sup>WRKY</sup>) was expressed in *E. coli* SHuffle  
404 cells. The proteins were purified via immobilized metal-affinity chromatography (IMAC)  
405 followed by size-exclusion chromatography. Purified fractions were pooled and  
406 concentrated to 15 mg/mL and used for further studies. Detailed procedures are provided  
407 in the *SI Materials and Methods*.

### 408 **Crystallization and Structure Determination**

409 Crystals of the AvrRps4<sup>C</sup>/RRS1<sup>WRKY</sup> complex were obtained from a 1:1 solution of 15  
410 mg/mL protein with 0.8 M Potassium sodium tartrate tetrahydrate, 0.1 M Sodium

411 HEPES pH 7.5. Diffraction data were collected at the Diamond Light Source on the i03  
412 beamline and processed in  $P6_{1/5}22$  space group. The structure was determined by  
413 molecular replacement using the model of a monomer of AvrRps4<sup>C</sup> (PDB ID: 4B6X) and  
414 the RRS1<sup>WRKY</sup> from the PopP2/RRS1<sup>WRKY</sup> complex (PDB ID: 5W3X) as search model.  
415 Further details are provided in the *SI Materials and Methods*. X-ray data collection and  
416 refinement statistics are summarized in Table 2.

#### 417 **In vitro Protein–Protein Interaction studies**

418 AvrRps4<sup>C</sup>/RRS1<sup>WRKY</sup> complex formation in vitro was studied using analytical gel  
419 filtration chromatography and isothermal titration calorimetry (ITC). The effect of  
420 structure-guided mutations on the AvrRps4<sup>C</sup>/RRS1<sup>WRKY</sup> interaction in vitro was  
421 investigated using isothermal titration calorimetry (ITC) as described in the *SI Materials*  
422 *and Methods*.

#### 423 **Transient cell death assays and co-Immunoprecipitation studies**

424 Agrobacterium mediated transient cell death assays were performed in *N. tabacum* and  
425 co-immunoprecipitation assays were performed in *N. benthamiana*. Detailed information  
426 concerning plant materials, growth conditions, plasmid construction and immunoblotting  
427 are provided in the *SI Materials and Methods*.

#### 428 **Arabidopsis HR assays and bacterial growth assays**

429 Bacterial strain *P. fluorescens* Pf0-EtHAn and *Pto*DC3000 was used for HR or in  
430 planta bacterial growth assays, respectively. The *Arabidopsis thaliana* accessions Ws-2  
431 and Col-0 were used as wild-type for all the assays in this study. Further details about  
432 plant materials, growth conditions, plasmid construction and mobilization, pathogen  
433 infection assays and bacterial growth assays are provided in the *SI Materials and*  
434 *Methods*.

435 **Acknowledgments**

436 This work was supported by the European Research Council [ERC; proposal 669926];  
437 the UKRI Biotechnology and Biological Sciences Research Council (BBSRC) Norwich  
438 Research Park Biosciences Doctoral Training Partnership, UK [grant BB/M011216/1];  
439 the UKRI BBSRC, UK [grants BB/P012574, BBS/E/J/000PR9795]; the BBSRC Future  
440 Leader Fellowship (grant BB/R012172/1). We would like to thank Dr. Clare Stevenson,  
441 Julia Mundy and Professor David Lawson from the JIC Biophysical Analysis and X-ray  
442 Crystallography platform for their support with ITC, CD spectroscopy, protein  
443 crystallization and X-ray data collection, Andrew Davies and Phil Robinson from JIC  
444 Scientific Photography for their help with leaf imaging. We also thank Dr. Kee Hoon  
445 Sohn for helpful suggestions for tri-parental mating and other members of Banfield and  
446 Jones laboratory for discussions.

447 **References**

448

- 449 1. P. N. Dodds, J. P. Rathjen, Plant immunity: towards an integrated view of plant-  
450 pathogen interactions. *Nature Reviews Genetics* **11**, 539-548 (2010).
- 451 2. N. Mukhi, D. Gorenkin, M. J. Banfield, Exploring folds, evolution and host  
452 interactions: understanding effector structure/function in disease and immunity.  
453 *New Phytologist* **227**, 326-333 (2020).
- 454 3. M. Khan, D. Seto, R. Subramaniam, D. Desveaux, Oh, the places they'll go! A  
455 survey of phytopathogen effectors and their host targets. *The Plant Journal* **93**,  
456 651-663 (2018).
- 457 4. J. D. G. Jones, J. L. Dangl, The plant immune system. *Nature* **444**, 323-329  
458 (2006).
- 459 5. A. R. Bentham *et al.*, A molecular roadmap to the plant immune system. *Journal*  
460 *of Biological Chemistry* **295**, 14916-14935 (2020).
- 461 6. J. D. G. Jones, R. E. Vance, J. L. Dangl, Intracellular innate immune surveillance  
462 devices in plants and animals. *Science* **354**, aaf6395 (2016).
- 463 7. H. H. Flor, Current Status of the Gene-For-Gene Concept. *Annual Review of*  
464 *Phytopathology* **9**, 275-296 (1971).
- 465 8. A. C. Barragan, D. Weigel, Plant NLR diversity: the known unknowns of pan-  
466 NLRomes. *The Plant Cell* **33**, 814-831 (2021).
- 467 9. Z. Duxbury *et al.*, Pathogen perception by NLRs in plants and animals: Parallel  
468 worlds. *Bioessays* **38**, 769-781 (2016).
- 469 10. S. Cesari, M. Bernoux, P. Moncuquet, T. Kroj, P. N. Dodds, A novel conserved  
470 mechanism for plant NLR protein pairs: the "integrated decoy" hypothesis.  
471 *Frontiers in plant science* **5**, 606-606 (2014).
- 472 11. Marc T. Nishimura, F. Monteiro, Jeffery L. Dangl, Treasure Your Exceptions:  
473 Unusual Domains in Immune Receptors Reveal Host Virulence Targets. *Cell* **161**,  
474 957-960 (2015).
- 475 12. A. Maqbool *et al.*, Structural basis of pathogen recognition by an integrated HMA  
476 domain in a plant NLR immune receptor. *eLife* **4**, e08709 (2015).
- 477 13. Panagiotis F. Sarris *et al.*, A Plant Immune Receptor Detects Pathogen Effectors  
478 that Target WRKY Transcription Factors. *Cell* **161**, 1089-1100 (2015).
- 479 14. C. Le Roux *et al.*, A Receptor Pair with an Integrated Decoy Converts Pathogen  
480 Disabling of Transcription Factors to Immunity. *Cell* **161**, 1074-1088 (2015).
- 481 15. S. Cesari *et al.*, The Rice Resistance Protein Pair RGA4/RGA5 Recognizes the  
482 Magnaporthe oryzae Effectors AVR-Pia and AVR1-CO39 by Direct Binding *The*  
483 *Plant Cell* **25**, 1463-1481 (2013).
- 484 16. S. Cesari, M. Bernoux, P. Moncuquet, T. Kroj, P. N. Dodds, A novel conserved  
485 mechanism for plant NLR protein pairs: the "integrated decoy" hypothesis. *Front*  
486 *Plant Sci* **5**, 606 (2014).
- 487 17. H. Adachi, L. Derevnina, S. Kamoun, NLR singletons, pairs, and networks:  
488 evolution, assembly, and regulation of the intracellular immunoreceptor circuitry  
489 of plants. *Curr Opin Plant Biol* **50**, 121-131 (2019).
- 490 18. S. U. Huh *et al.*, Protein-protein interactions in the RPS4/RRS1 immune receptor  
491 complex. *PLOS Pathogens* **13**, e1006376 (2017).



- 492 19. M. Narusaka, K. Hatakeyama, K. Shirasu, Y. Narusaka, Arabidopsis dual  
493 resistance proteins, both RPS4 and RRS1, are required for resistance to bacterial  
494 wilt in transgenic Brassica crops. *Plant Signal Behav* **9**, e29130 (2014).
- 495 20. W. Gassmann, M. E. Hinsch, B. J. Staskawicz, The Arabidopsis RPS4 bacterial-  
496 resistance gene is a member of the TIR-NBS-LRR family of disease-resistance  
497 genes. *The Plant Journal* **20**, 265-277 (1999).
- 498 21. M. Hinsch, B. Staskawicz, Identification of a new Arabidopsis disease resistance  
499 locus, RPs4, and cloning of the corresponding avirulence gene, avrRps4, from  
500 *Pseudomonas syringae* pv. pisi. *Mol Plant Microbe Interact* **9**, 55-61 (1996).
- 501 22. L. Deslandes *et al.*, Physical interaction between RRS1-R, a protein conferring  
502 resistance to bacterial wilt, and PopP2, a type III effector targeted to the plant  
503 nucleus. *Proceedings of the National Academy of Sciences* **100**, 8024 (2003).
- 504 23. C. Tasset *et al.*, Autoacetylation of the *Ralstonia solanacearum* Effector PopP2  
505 Targets a Lysine Residue Essential for RRS1-R-Mediated Immunity in  
506 Arabidopsis. *PLOS Pathogens* **6**, e1001202 (2010).
- 507 24. Y. Ma *et al.*, Distinct modes of derepression of an  
508 &lt;em>Arabidopsis</em> immune receptor complex by two different  
509 bacterial effectors. *Proceedings of the National Academy of Sciences* **115**, 10218  
510 (2018).
- 511 25. S. B. Saucet *et al.*, Two linked pairs of Arabidopsis TNL resistance genes  
512 independently confer recognition of bacterial effector AvrRps4. *Nature*  
513 *Communications* **6**, 6338 (2015).
- 514 26. K. H. Sohn, Y. Zhang, J. D. Jones, The *Pseudomonas syringae* effector protein,  
515 AvrRPS4, requires in planta processing and the KRVY domain to function. *Plant*  
516 *J* **57**, 1079-1091 (2009).
- 517 27. K. H. Sohn, R. K. Hughes, S. J. Piquerez, J. D. G. Jones, M. J. Banfield, Distinct  
518 regions of the &lt;em>Pseudomonas syringae</em> coiled-coil effector  
519 AvrRps4 are required for activation of immunity. *Proceedings of the National*  
520 *Academy of Sciences* **109**, 16371 (2012).
- 521 28. J. Su *et al.*, The Conserved Arginine Required for AvrRps4 Processing Is Also  
522 Required for Recognition of Its N-Terminal Fragment in Lettuce. *Molecular*  
523 *Plant-Microbe Interactions*® **34**, 270-278 (2020).
- 524 29. M. K. Halane *et al.*, The bacterial type III-secreted protein AvrRps4 is a bipartite  
525 effector. *PLOS Pathogens* **14**, e1006984 (2018).
- 526 30. Z.-M. Zhang *et al.*, Mechanism of host substrate acetylation by a YopJ family  
527 effector. *Nat Plants* **3**, 17115-17115 (2017).
- 528 31. M. S. Mukhtar *et al.*, Independently Evolved Virulence Effectors Converge onto  
529 Hubs in a Plant Immune System Network. *Science* **333**, 596 (2011).
- 530 32. M.-R. Duan *et al.*, DNA binding mechanism revealed by high resolution crystal  
531 structure of Arabidopsis thaliana WRKY1 protein. *Nucleic Acids Res* **35**, 1145-  
532 1154 (2007).
- 533 33. E. Krissinel, K. Henrick, Inference of Macromolecular Assemblies from  
534 Crystalline State. *Journal of Molecular Biology* **372**, 774-797 (2007).
- 535 34. W. J. Thomas, C. A. Thireault, J. A. Kimbrel, J. H. Chang, Recombineering and  
536 stable integration of the *Pseudomonas syringae* pv. *syringae* 61 hrp/hrc cluster

- 537 into the genome of the soil bacterium *Pseudomonas fluorescens* Pf0-1. *The Plant*  
538 *Journal* **60**, 919-928 (2009).
- 539 35. K. Tsuda, I. E. Somssich, Transcriptional networks in plant immunity. *New*  
540 *Phytologist* **206**, 932-947 (2015).
- 541 36. D. W. K. Ng, J. K. Abeysinghe, M. Kamali, Regulating the Regulators: The  
542 Control of Transcription Factors in Plant Defense Signaling. *Int J Mol Sci* **19**,  
543 3737 (2018).
- 544 37. F. Jacob *et al.*, A dominant-interfering *camta3* mutation compromises primary  
545 transcriptional outputs mediated by both cell surface and intracellular immune  
546 receptors in *Arabidopsis thaliana*. *New Phytol* **217**, 1667-1680 (2018).
- 547 38. K. Zhai *et al.*, RRM Transcription Factors Interact with NLRs and Regulate  
548 Broad-Spectrum Blast Resistance in Rice. *Molecular Cell* **74**, 996-1009.e1007  
549 (2019).
- 550 39. P. D. Townsend *et al.*, The intracellular immune receptor Rx1 regulates the DNA-  
551 binding activity of a Golden2-like transcription factor. *Journal of Biological*  
552 *Chemistry* **293**, 3218-3233 (2018).
- 553 40. F. Xu *et al.*, NLR-Associating Transcription Factor bHLH84 and Its Paralogs  
554 Function Redundantly in Plant Immunity. *PLOS Pathogens* **10**, e1004312 (2014).
- 555 41. C. Chang *et al.*, Barley MLA immune receptors directly interfere with  
556 antagonistically acting transcription factors to initiate disease resistance signaling.  
557 *Plant Cell* **25**, 1158-1173 (2013).
- 558 42. X. Liu, H. Inoue, N. Hayashi, C.-J. Jiang, H. Takatsuji, CC-NBS-LRR-Type R  
559 Proteins for Rice Blast Commonly Interact with Specific WRKY Transcription  
560 Factors. *Plant Molecular Biology Reporter* **34**, 533-537 (2016).
- 561 43. X. Chen, C. Li, H. Wang, Z. Guo, WRKY transcription factors: evolution,  
562 binding, and action. *Phytopathology Research* **1**, 13 (2019).
- 563 44. S. H. Wani, S. Anand, B. Singh, A. Bohra, R. Joshi, WRKY transcription factors  
564 and plant defense responses: latest discoveries and future prospects. *Plant Cell*  
565 *Reports* **40**, 1071-1085 (2021).
- 566 45. J. Jiang *et al.*, WRKY transcription factors in plant responses to stresses. *Journal*  
567 *of Integrative Plant Biology* **59**, 86-101 (2017).
- 568 46. K. Yamasaki *et al.*, Structural basis for sequence-specific DNA recognition by an  
569 *Arabidopsis* WRKY transcription factor. *J Biol Chem* **287**, 7683-7691 (2012).
- 570 47. Y.-p. Xu, H. Xu, B. Wang, X.-D. Su, Crystal structures of N-terminal WRKY  
571 transcription factors and DNA complexes. *Protein & Cell* **11**, 208-213 (2020).
- 572 48. I. Ciolkowski, D. Wanke, R. P. Birkenbihl, I. E. Somssich, Studies on DNA-  
573 binding selectivity of WRKY transcription factors lend structural clues into  
574 WRKY-domain function. *Plant Mol Biol* **68**, 81-92 (2008).
- 575 49. T. Eulgem, P. J. Rushton, S. Robatzek, I. E. Somssich, The WRKY superfamily  
576 of plant transcription factors. *Trends in Plant Science* **5**, 199-206 (2000).
- 577 50. P. F. Sarris, V. Cevik, G. Dagdas, J. D. G. Jones, K. V. Krasileva, Comparative  
578 analysis of plant immune receptor architectures uncovers host proteins likely  
579 targeted by pathogens. *BMC Biology* **14**, 8 (2016).

- 580 51. Y. Xing *et al.*, Bacterial effector targeting of a plant iron sensor facilitates iron  
581 acquisition and pathogen colonization. *The Plant Cell* 10.1093/plcell/koab075  
582 (2021).
- 583 52. J. C. De la Concepcion *et al.*, Polymorphic residues in rice NLRs expand binding  
584 and response to effectors of the blast pathogen. *Nat Plants* **4**, 576-585 (2018).
- 585 53. J. C. De la Concepcion *et al.*, Protein engineering expands the effector recognition  
586 profile of a rice NLR immune receptor. *eLife* **8**, e47713 (2019).
- 587 54. J. H. R. Maidment *et al.*, Multiple variants of the fungal effector AVR-Pik bind  
588 the HMA domain of the rice protein OsHIPP19, providing a foundation to  
589 engineer plant defence. *J Biol Chem* **296**, 100371 (2021).
- 590 55. R. Martin *et al.*, Structure of the activated ROQ1 resistosome directly recognizing  
591 the pathogen effector XopQ. *Science* **370**, eabd9993 (2020).
- 592 56. S. Ma *et al.*, Direct pathogen-induced assembly of an NLR immune receptor  
593 complex to form a holoenzyme. *Science* **370** (2020).
- 594 57. J. Wang *et al.*, Ligand-triggered allosteric ADP release primes a plant NLR  
595 complex. *Science* **364**, eaav5868 (2019).
- 596 58. J. Wang *et al.*, Reconstitution and structure of a plant NLR resistosome conferring  
597 immunity. *Science* **364**, eaav5870 (2019).
- 598 59. S. Cesari *et al.*, Design of a new effector recognition specificity in a plant NLR  
599 immune receptor by molecular engineering of its integrated decoy domain.  
600 *bioRxiv* 10.1101/2021.04.24.441256, 2021.2004.2024.441256 (2021).
- 601 60. Á. Piñeiro *et al.*, AFFINImeter: A software to analyze molecular recognition  
602 processes from experimental data. *Analytical Biochemistry* **577**, 117-134 (2019).  
603

604

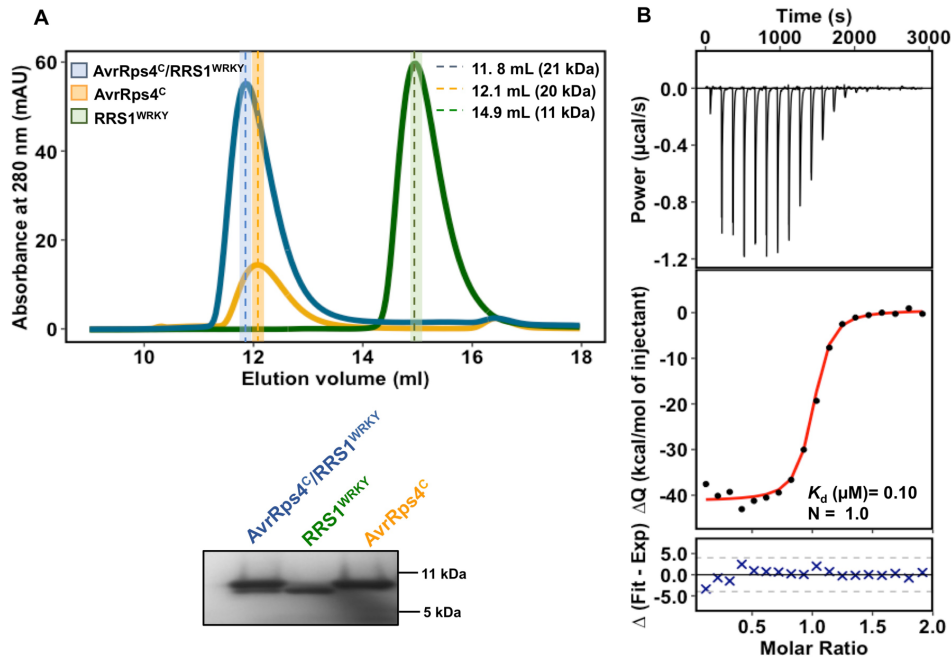

605

606 **Fig. 1. AvrRps4<sup>C</sup> interacts with the WRKY domain of RRS1 in vitro.** A) Analytical  
607 gel filtration traces for AvrRps4<sup>C</sup> alone (Gold), RRS1<sup>WRKY</sup> alone (green) and AvrRps4<sup>C</sup>  
608 with RRS1<sup>WRKY</sup> (Blue). An equimolar ratio of AvrRps4<sup>C</sup> and RRS1<sup>WRKY</sup> was used for the  
609 analysis. AvrRps4<sup>C</sup> runs as a dimer *in vitro*. Poor absorbance for AvrRps4<sup>C</sup> at 280nm is  
610 due its low molar extinction coefficient. (B) Isothermal titration calorimetry (ITC)  
611 titrations of AvrRps4<sup>C</sup> with RRS1<sup>WRKY</sup>. Raw processed thermogram after baseline  
612 correction and noise removal is displayed in the upper panel. The lower panel represents  
613 the experimental binding isotherm obtained for the interaction of AvrRps4<sup>C</sup> and  
614 RRS1<sup>WRKY</sup> together with the global fitted curves (displayed in red) obtained from three  
615 independent experiments using Affinimeter software (60).  $K_d$  and binding stoichiometry  
616 ( $N$ ) were derived from fitting to 1:1 binding model.

24

617

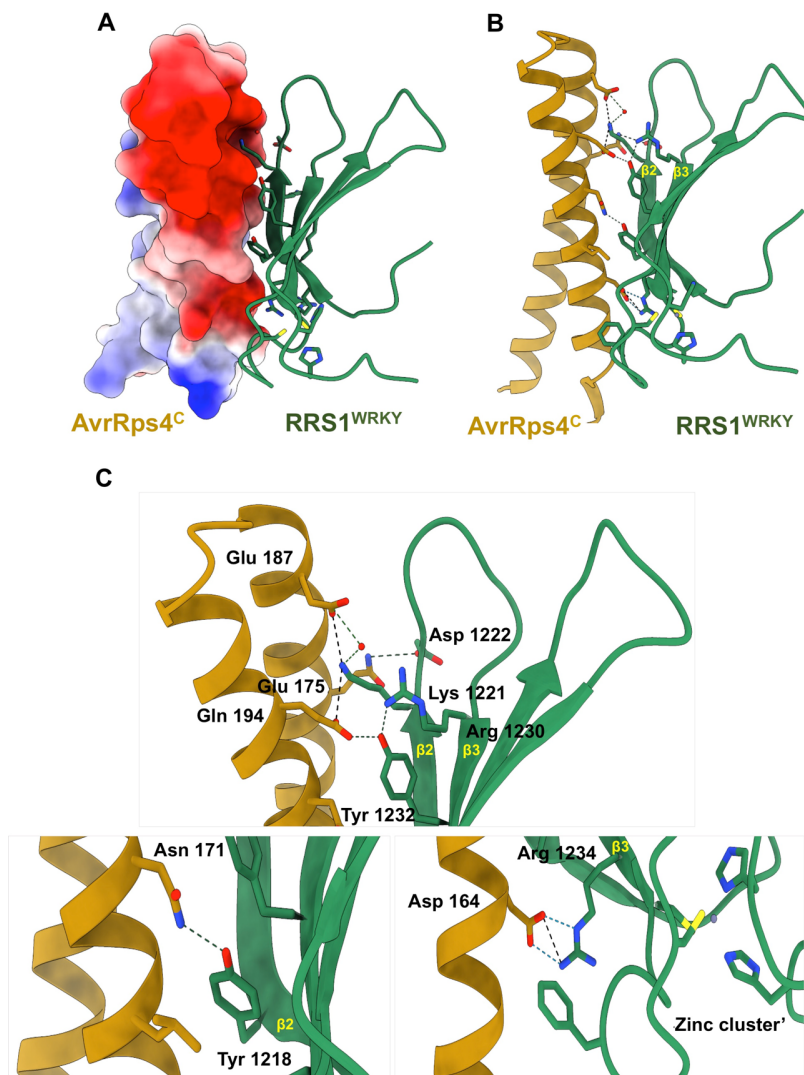

618

619 **Fig. 2. Structure of the AvrRps4<sup>C</sup>/RRS1<sup>WRKY</sup> complex.** (A) Electrostatic surface  
620 representation of AvrRps4<sup>C</sup> in AvrRps4<sup>C</sup>/RRS1<sup>WRKY</sup> crystal structure displaying  
621 prominent negative patch in AvrRps4 at the interacting interface. (B) Schematic  
622 representation of AvrRps4<sup>C</sup>/RRS1<sup>WRKY</sup>, highlighting interfacing residues. AvrRps4<sup>C</sup> is  
623 shown in gold cartoon and RRS1<sup>WRKY</sup> is shown in green with surface exposed side chains  
624 as sticks. (C) Close-up view of the interactions of AvrRps4<sup>C</sup> with  $\beta 2$ ,  $\beta 3$  segment of  
625 RRS1<sup>WRKY</sup>. Hydrogen bonds are shown as dashed lines, and water molecules depicted as  
626 red spheres. The Zn<sup>2+</sup> ion is also displayed.



627

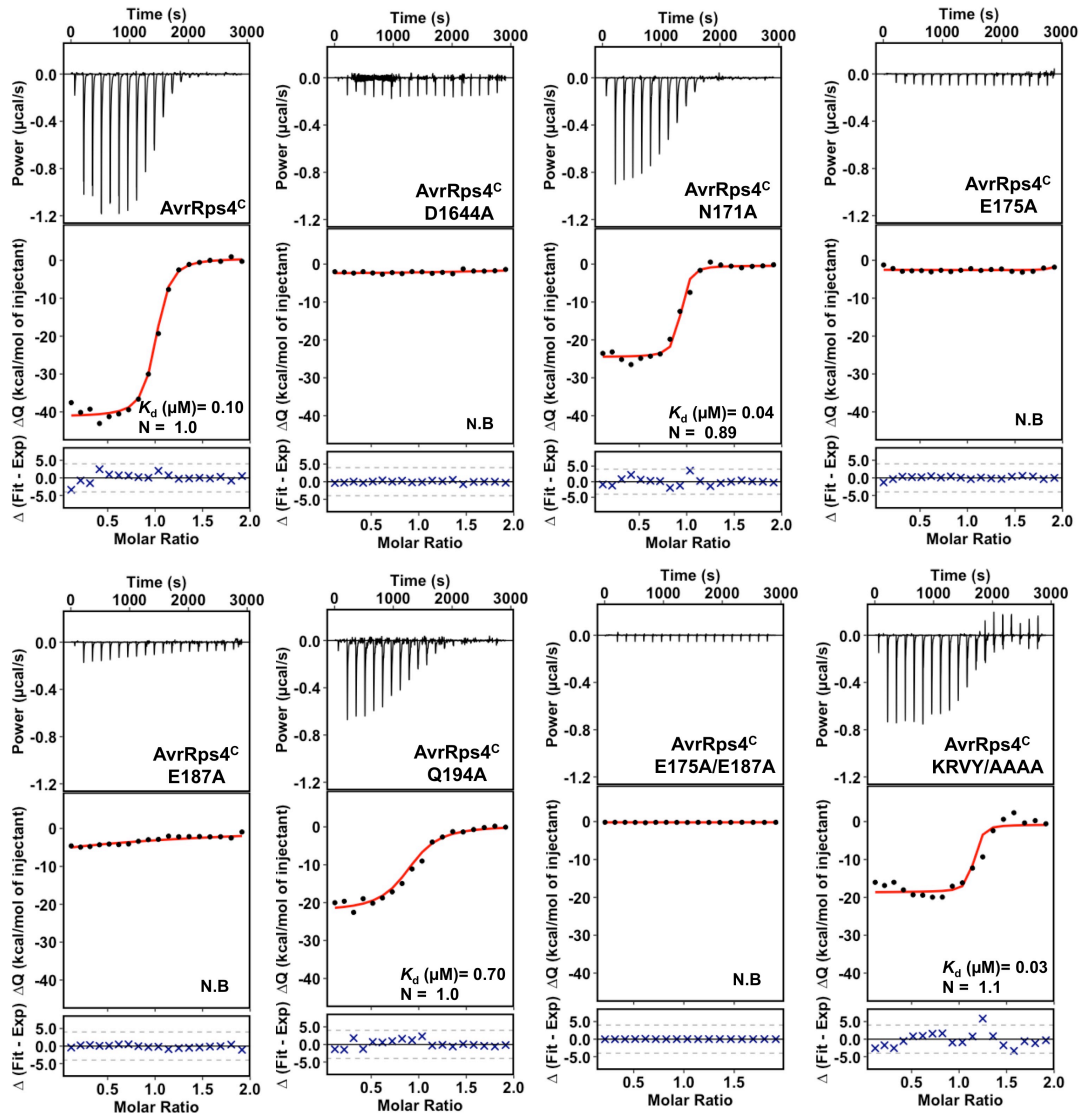

628

629 **Fig. 3. Structure-guided mutants of AvrRps4<sup>C</sup> at the AvrRps4<sup>C</sup>/RRS1<sup>WRKY</sup> interface**  
 630 **disrupts interaction with the RRS1<sup>WRKY</sup> in vitro.** Isothermal titration calorimetry  
 631 (ITC) titrations of wild-type AvrRps4<sup>C</sup> and mutants with RRS1<sup>WRKY</sup>. Upper panels: raw  
 632 processed thermograms after baseline correction and noise removal. Lower panels:  
 633 experimental binding isotherm obtained for the interaction of AvrRps4<sup>C</sup> wild-type and  
 634 mutants with RRS1<sup>WRKY</sup> together with the global fitted curves (displayed in red) obtained  
 635 from three independent experiments using Affinimeter software (60).  $K_d$  was derived  
 636 from fitting to 1:1 binding model.

26

637

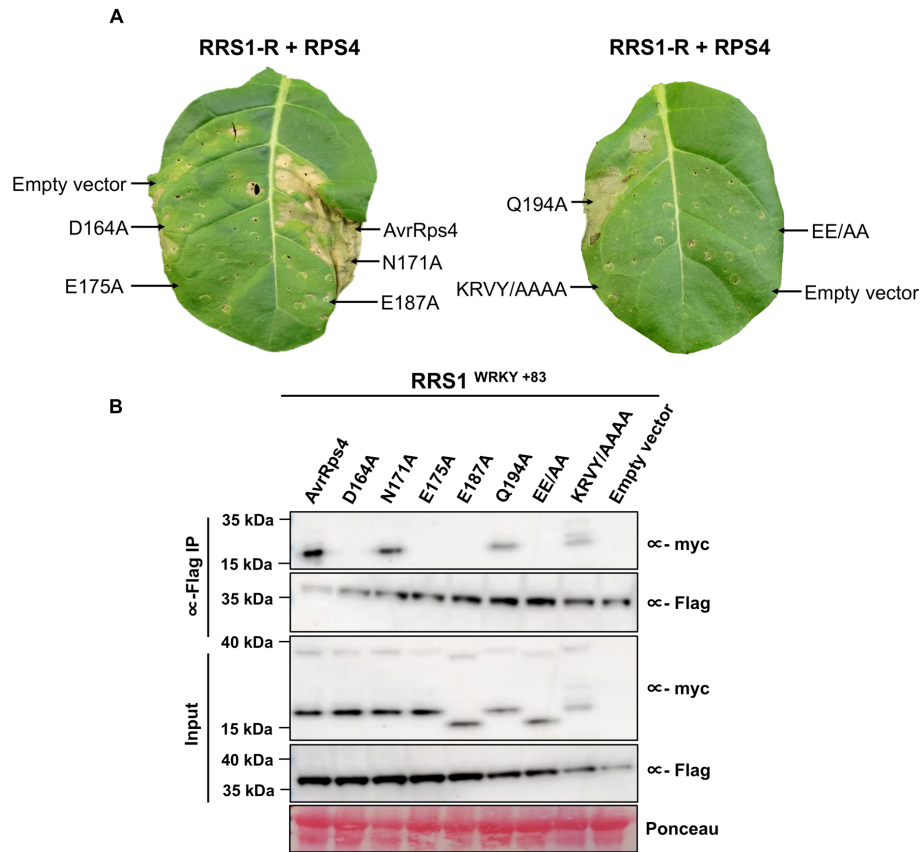

638

639 **Fig. 4. Structure-guided mutants of AvrRps4 at the AvrRps4<sup>C</sup>/RRS1<sup>WRKY</sup> interface**  
640 **compromises RRS1-R/RPS4 mediated cell death responses and in vivo binding in**  
641 ***Nicotiana*.** (A) Representative leaf images showing RRS1-R/RPS4 mediated cell death  
642 response to wild-type structure-guided mutants of AvrRps4. Agroinfiltration assays were  
643 performed in 4- to 5-week-old *N. tabacum* leaves, and cell death was assessed at 4 dpi.  
644 The experiment was repeated three times with similar results. (B) Co-IP of RRS1-  
645 R<sup>WRKY+83</sup> (6xHis/3xFLAG-tagged) with AvrRps4<sup>C</sup> and variants (4xmyc-tagged) in *N.*  
646 *benthamiana*. Blots show protein accumulations in total protein extracts (input) and  
647 immunoprecipitates obtained with anti-FLAG magnetic beads when probed with  
648 appropriate antisera. Empty vector was used as a control. The experiment was repeated at  
649 least three times, with similar results.

650

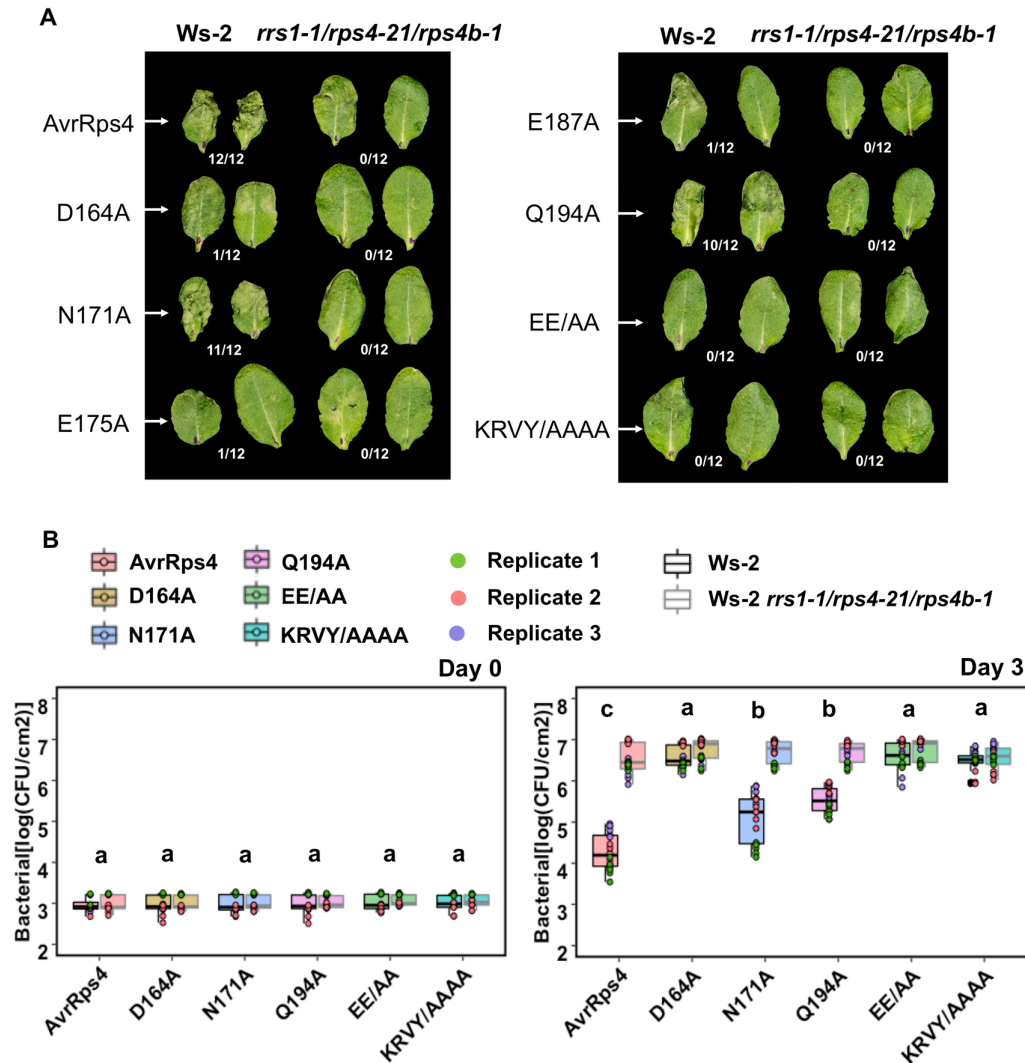

651

652 **Fig. 5. Structural-guided mutants of AvrRps4 compromises RRS1-R/RPS4**  
 653 **dependent recognition specifics and restriction of bacterial growth in Arabidopsis.**

654 (A) Hypersensitive response (HR) assay in different *Arabidopsis* accessions  
 655 using *Pseudomonas fluorescens* (Pf) Pf0-1 secreting AvrRps4 wild-type and structure-  
 656 guided mutants. Constructs were delivered to Arabidopsis Ws-2 and *rrs1-1/rps4-*  
 657 *21/rps4b-1* knock-out background and HR was recorded 20 hours post-infiltration.  
 658 Fraction refers to number of leaves showing HR of 12 randomly inoculated leaves. This  
 659 experiment was repeated at least three times with similar results. (B) In planta bacterial



660 growth assays of *Pto* DC3000 secreting AvrRps4 wild-type and mutant  
661 constructs. Bacterial suspensions with  $OD_{600} = 0.001$  were pressure infiltrated into the  
662 leaves of 4-5-week-old Arabidopsis plants. Values are plotted from three independent  
663 experiments (denoted in different colors). Statistical significance of the values was  
664 calculated by one-way ANOVA followed by post-hoc Tukey HSD analysis. Letters  
665 above the data points denotes significant differences ( $P < 0.05$ ). Detailed statistical  
666 summary can be found in Table 5.

## 1 **Supplementary information**

2

### 3 **Materials and Methods**

#### 4 **Protein production and purification**

#### 5 **Gene cloning, expression, and purification of proteins for in vitro binding studies**

6 Gene fragment of AvrRps4<sup>C</sup> (134–221) was cloned in pOPIN-F (with a cleavable 6xHis-tag)  
7 expression vector while DNA fragments of RRS1<sup>WRKY</sup> (1194-1273), RRS1B<sup>WRKY</sup> (Asn1164-  
8 Thr1241), and AtWRKY41 (Thr125-Ile204) were cloned in pOPIN-M (with a cleavable 6xHis-  
9 MBP-tag) expression vector using in-fusion cloning strategy (Clontech, Mountain View, CA,  
10 United States) (1). The constructs were then transformed in *Escherichia coli* (*E. coli*) SHuffle cells  
11 for expression. Bacterial cultures were grown in LB media (with 100 µg/mL carbenicillin) at 30°C  
12 to an OD<sub>600</sub> = 0.6 followed by induction with 1 mM IPTG (isopropyl β-D-1-  
13 thiogalactopyranoside) and overnight growth 18°C. The cells were harvested by centrifugation at  
14 6,000 g for 10 min and resuspended in Buffer A1 (50mM HEPES pH (8.0), 50mM glycine, 500mM  
15 NaCl, 30 mM imidazole and 5% v/v glycerol, EDTA free protease inhibitor tablets [1 tablet/50mL  
16 of A1 buffer]) followed by lysis by sonication with VC 750 VibraCell™ (Sonics) at 40 %  
17 amplitude, 1 sec on/3 sec off pulse for 20 min on ice. Cell debris was removed by centrifugation  
18 at 45,000 g for 60 mins. Purification of the proteins was performed using an ÄKTA Xpress  
19 purification system following two-step programme comprising initial capture by immobilised  
20 metal affinity chromatography (IMAC) [Step elution by Buffer B1 – Buffer A1 supplemented with  
21 500 mM imidazole] followed by gel filtration with Superdex 75 26/600 gel filtration column pre-  
22 equilibrated in Buffer A4 (20 mM HEPES pH 7.5, 150 mM NaCl) supplemented with 1 mM TCEP.  
23 Fractions under the elution peak from the gel filtration columns were assessed by SDS-PAGE for  
24 the presence of the purified proteins and were then pooled and treated with 3C protease (10 µg/mg  
25 fusion protein) overnight at 4°C to cleave the 6xHis/6xHis-MBP-tag respectively. Cleaved 6xHis  
26 and 6xHis-MBP tags were then separated from their respective digested protein samples by passing  
27 the samples through a Ni<sup>2+</sup>-NTA column and collecting the flow-through and wash samples. These  
28 samples were assessed by SDS-PAGE, pooled and concentrated via 3 kDa cut-off spin  
29 concentrators before subjecting to a second round of size-exclusion with a Superdex 75 16/600 gel

30 filtration column pre-equilibrated in Buffer A4. Eluted samples were then concentrated via 3 kDa  
31 cut-off spin concentrators to a final concentration of 10-15 mg/mL (as calculated by Nanodrop  
32 (ThermoFisher Scientific™, NanoDrop™ One Microvolume UV-Vis Spectrophotometer) at  $A_{205}$ )  
33 and were aliquoted and flash frozen at  $-80^{\circ}\text{C}$  for subsequent analysis.

34

### 35 **Expression and purification of proteins for crystallization**

36 For crystallization of the AvrRps4<sup>C</sup>/RRS1<sup>WRKY</sup> complex, AvrRps4<sup>C</sup> was cloned in pOPIN-A to  
37 express untagged protein and pOPIN-M construct of RRS1<sup>WRKY</sup> (with cleavable 6xHis-MBP-tag)  
38 was used as mentioned above. Both the constructs were transformed individually into *E. coli*  
39 SHuffle cells and expressed using the above-mentioned conditions. The bacterial cells expressing  
40 AvrRps4<sup>C</sup> and RRS1<sup>WRKY</sup> were then mixed together, lysed and the proteins were co-purified via  
41 IMAC followed by size-exclusion chromatography as mentioned above. Eluted fractions were  
42 assessed by SDS-PAGE. The presence of untagged AvrRps4<sup>C</sup> in the RRS1<sup>WRKY</sup> eluted fractions  
43 confirmed complex formation in vitro. The eluted complex was subjected to 3C protease cleavage  
44 overnight at  $4^{\circ}\text{C}$  followed by an IMAC step to remove the cleaved 6xHis-MBP-tag. Fractions  
45 containing the untagged complex were then pooled, concentrated, and subjected to final gel  
46 filtration chromatography. The purified complex was concentrated to 15 mg/mL, aliquoted and  
47 used for crystallization studies.

48

### 49 **Crystallization, data collection and structure solution**

50 For crystallization of the AvrRps4<sup>C</sup>/RRS1<sup>WRKY</sup> complex, the sitting drop vapour diffusion method  
51 was used. Potential crystallization conditions were explored using commercially available  
52 crystallization screens. All crystallization trials were setup in 96-well plates, using an Oryx nano  
53 robot (Douglas Instruments) at a concentration of 7.5 mg/mL and 15 mg/mL at  $20^{\circ}\text{C}$ . Crystals of  
54 the AvrRps4<sup>C</sup>/RRS1<sup>WRKY</sup> complex appeared after few weeks in a condition comprising 0.8M  
55 Potassium sodium tartrate tetrahydrate, 0.1 M Sodium HEPES pH 7.5 from the Morpheus™  
56 screen. The crystals were snap frozen in liquid nitrogen and shipped to the Diamond Light Source  
57 for X-ray data collection.

58

59 Diffraction data was collected at Diamond Light Source, i03 beamline, under proposal mx18565.  
60 The data were scaled and merged by Aimless in the CCP4i2 software package (2). The  
61 AvrRps4<sup>C</sup>/RRS1<sup>WRKY</sup> complex structure was solved by molecular replacement using PHASER (3)  
62 with the structures of AvrRps4<sup>C</sup> (PDB ID: 4B6X) and PopP2/RRS1<sup>WRKY</sup> (PDB ID: 5W3X) as  
63 search models. Iterative cycles of manual model building using COOT (4) and ISOLDE (5) and  
64 refined using REFMAC (6) produced the final structure, which was then validated using  
65 MolProbity (7). Interaction interfaces were analyzed using PdbEISA (8). Models were visualized  
66 using ChimeraX (9). The final protein model, and the data used to derive it, can be found in Protein  
67 Data Bank (PDB) (<https://www.ebi.ac.uk/pdbe/>) with the PDB ID: 7P8K.

68

### 69 **Circular dichroism spectroscopy**

70 Purified AvrRps4<sup>C</sup> wild-type and mutants were dialyzed in 10mM phosphate buffer, pH 8.0 at a  
71 final concentration of 0.5 mg/mL. Samples were analyzed in the far-UV region between 190-260  
72 nm at 20°C by using Chirascan<sup>TM</sup> plus CD Spectrometer (Applied Photophysics) and quartz  
73 cuvette of path length 1mm. For each sample, three successive spectral scans were averaged and  
74 adjusted by subtracting corresponding blanks. The results were plotted using ggplot2 in R (10)

75

### 76 **In vitro Protein-Protein Interaction studies**

#### 77 **Analytical gel filtration**

78 To study AvrRps4<sup>C</sup> and RRS1<sup>WRKY</sup> complex formation in vitro, individual proteins (at a  
79 concentration of 1 mg/mL) were applied to pre-equilibrated (Equilibration buffer - 20 mM HEPES  
80 pH 7.5, 150 mM NaCl, 1 mM TCEP) Superdex 75 10/300 analytical column (GE-Healthcare)  
81 using an AKTA Explorer (GE-Healthcare) at 4°C and eluted at a flow rate of 0.5 mL/min by  
82 monitoring the absorbance at 280 nm. 500 µL fractions were collected and analyzed by SDS-  
83 PAGE. For complex formation, proteins were combined in a 1:1 molar ratio and incubated on ice  
84 for 1-2 hrs before the analysis. The results were plotted using ggplot2 in R (10)

85

### 86 **Isothermal titration calorimetry (ITC)**

87 ITC experiments were performed using a MicroCal PEAQ-ITC (Malvern, UK). To test the  
88 interaction of AvrRPS4<sup>C</sup> wild-type or structure-guided mutants with RRS1<sup>WRKY</sup>, *At*WRKY41 or  
89 RRS1B<sup>WRKY</sup>, the calorimetric cell was filled with 20  $\mu$ M of RRS1<sup>WRKY</sup>/*At*WRKY 41/RRS1B<sup>WRKY</sup>  
90 and titrated with 200  $\mu$ M of AvrRps4<sup>C</sup> wild-type/mutants in the syringe. Each ITC run included a  
91 single injection of 0.5  $\mu$ L followed by 18 injections of 2  $\mu$ L each. Injections were made at 120-  
92 second intervals with a stirring speed of 750 rpm. Data were processed with AFFINImeter ITC  
93 analysis software (11). ITC runs for wild-type and mutants were done in triplicate at 25°C using  
94 buffer A4. All the ITC curves were plotted using ggplot2 in R (10).

95

## 96 **Transient cell death assays and co-Immunoprecipitation studies**

### 97 ***N. tabacum* cell death assays**

98 Transient cell death assays were performed using 4-5 week-old *N. tabacum* “Petit Gerard” as  
99 described previously (12). Plants were grown in long days (16 hr light/8 hr dark) under high light  
100 intensity at 24°C. *Agrobacterium tumefaciens* GV3101 was used to deliver C-terminal 4xmyc-  
101 tagged full-length constructs of AvrRps4 wild-type and mutants, and C-terminal 6xHis/3xFLAG-  
102 tagged RRS1-R, RRS1-S, RRS1B, RPS4, RPS4B. *Agrobacterium* cells expressing these  
103 constructs were grown at 28°C, harvested, and resuspended in infiltration buffer (10 mM MgCl<sub>2</sub>,  
104 10 mM MES [pH 5.6]), supplemented with 150  $\mu$ M acetosyringone. Appropriate combinations of  
105 the above constructs were mixed at an OD<sub>600</sub> = 0.5 per construct and were hand infiltrated on the  
106 abaxial surface of 4-5 week-old *N. tabacum* leaves by a 1ml needleless syringe. Infiltrated leaves  
107 were detached 5 days post infiltration (dpi) and imaged under white light. The experiment was  
108 done in triplicate with similar results.

109

### 110 **In planta co-immunoprecipitation assays**

111 For co-immunoprecipitation assays, proteins were transiently expressed in 4-5 week old *N.*  
112 *benthamiana* leaves using agroinfiltration as described in (13). Leaf samples (4 g) were harvested  
113 at 3 dpi, frozen in liquid nitrogen, and ground to fine powder. A total of 8 mL (two times  
114 weight/volume) of ice-cold protein extraction buffer [10% glycerol, 1 mM EDTA, 25 mM Tris

115 [pH 7.5], 150 mM NaCl, 2% w/v PVPP, 10 mM DTT, 1x protease inhibitor cocktail [Sigma], 1 %  
116 vol/vol Nonidet P-40] was added to the ground tissue and samples were centrifuged at 6,000 × g  
117 at 4°C for 15 min. Supernatant was then filtered through miracloth to remove residual plant debris.  
118 50µL of the filtrate was aliquoted and ran on 4-20 % precast SDS-PAGE gels to check for the  
119 expression of the proteins in the input fraction. Residual samples were mixed with 50 µL Flag  
120 beads and incubated at 4°C (with constant rotation) for 1 hr. Flag beads were washed three times  
121 with IP buffer (10% glycerol, 1 mM EDTA, 25 mM Tris [pH 7.5], 150 mM NaCl, 1 % vol/vol  
122 Nonidet P-40) and re-suspended in 30 µL SDS-loading buffer. Immunoprecipitated samples were  
123 recovered from the flag beads by boiling at 70°C for 10 min. Eluted samples were separated by 4-  
124 20% precast SDS-PAGE, electroblotted onto PVDF membranes (Bio-Rad), and probed with HRP-  
125 conjugated anti-FLAG M2 (1:10000 dilution, Sigma) and anti-Myc (1:5000, Santa Cruz) as  
126 required.

127

## 128 **Arabidopsis HR assays and bacterial growth assays**

### 129 **Plant material and growth conditions**

130 Arabidopsis accessions Ws-2 and Col-0 were used as wild-type for all the assays in this study. Ws-  
131 2 was the background of the triple mutant *rrs1-1/rps4-21/rps4b-1* while double mutant *rrs1-1*-  
132 *3/rrs1b-1* and single mutants *rrs1-3* and *rrs1b-1* lines were in the Col-0 background. The plants  
133 were grown under short day conditions (10-h light/14-h dark) at 22°C and 65% humidity for 4-5  
134 weeks before being used for assays.

135

### 136 **Arabidopsis HR assays**

137 For Arabidopsis HR assays, Pf0-EtHAN was grown on King's B agar medium containing  
138 chloramphenicol (30 µg/ mL) at 28°C. Plasmids were mobilized into Pf0-EtHAN using tri-parental  
139 mating method using *E. coli* HB101 (pRK2013) as a helper strain as described in (14). For HR  
140 assays bacteria were grown overnight at 28°C in KB media and cells were harvested, washed and  
141 resuspended in freshly prepared sterile 10 mM MgCl<sub>2</sub>. Final concentration of the inoculum was  
142 adjusted to OD<sub>600</sub> = 0.3. The inoculum was then hand infiltrated into the leaves of 5-week-old  
143 plants with 1-ml needleless syringes. 5-6 leaves were infiltrated for each construct per genotype

144 per biological replicate. Plants were then blotted with the tissue to remove the excess bacteria and  
145 then kept at 22°C covered with a transparent dome. HR was scored 20 hrs post infection. The  
146 experiment was repeated three times with similar results.

147

#### 148 **Bacterial growth assay**

149 Pto DC3000 containing full-length 4xc-myc-tagged wild-type AvrRps4, or structure guided  
150 AvrRps4 mutant variants and the AvrRps4 KRYY/AAAA mutant (negative control) were grown  
151 on selective King's B (KB) medium plates (containing 50 µg/mL Rifampicin and 20 µg/mL  
152 Gentamycin) for 48 h at 28°C. Bacterial cells were harvested, washed and resuspended in sterile  
153 10 mM MgCl<sub>2</sub> to a final OD<sub>600</sub> = 0.001. The bacterial suspension was then hand infiltrated on the  
154 abaxial surface of 5-week-old Arabidopsis leaves using a 1mL needleless syringe. For the bacterial  
155 growth assays, 2 leaves each of 10 independent plants/genotype/construct constitute one biological  
156 replicate with three replicates in total. Samples from 4 plants were collected at day 0 and samples  
157 from 6 plants were collected at day 3. For quantification, 2 leaf discs from one plant (one leaf disc  
158 per leaf) were collected with a 6-mm-diameter cork borer (disc area - 0.283 cm<sup>2</sup>) and were ground  
159 in 200 µL of infiltration buffer (10 mM MgCl<sub>2</sub>). For day 0, samples from 4 plants were  
160 independently ground and spotted (10 µL /spot) on selective KB medium. For day 3, samples from  
161 6 plants were independently ground, serially diluted (5, 50, 5X10<sup>2</sup>, 5X10<sup>3</sup> and 5X10<sup>4</sup> times) and  
162 spotted (6 µL/spot) on selective KB medium. The plates were incubated at 28°C for two days  
163 before colony forming units (CFU/drop) were calculated. Bacterial growth is represented as CFU  
164 cm<sup>-2</sup> of leaf tissue. Statistical significance was determined by one-way ANOVA followed by post-  
165 hoc Tukey HSD analysis. The results were plotted using ggplot2 in R (10).

166

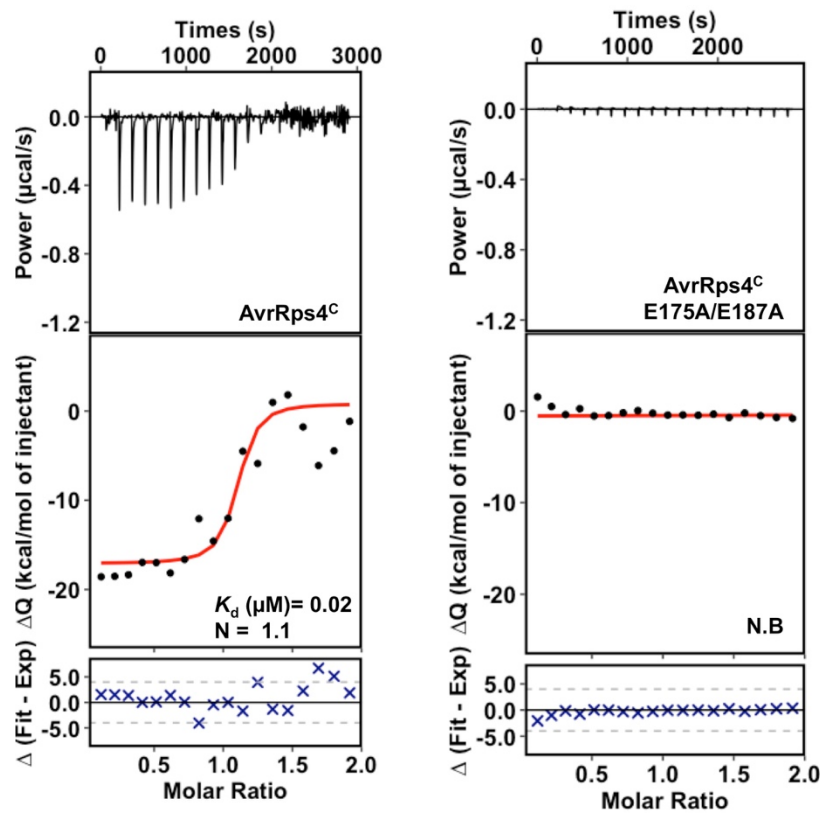

167

168 **Fig. S1.** *AvrRps4<sup>C</sup>* interacts with *AtWRKY41* in vitro. Isothermal titration calorimetry (ITC) of  
169 *AtWRKY41* with wild-type *AvrRps4<sup>C</sup>* and *AvrRps4<sup>C</sup> E175A/E187A* (EE/AA) mutant. Raw  
170 processed thermogram after baseline correction and noise removal is displayed in the upper panel.  
171 The lower panel represents the experimental binding isotherm obtained for the interaction of  
172 *AvrRps4<sup>C</sup>* and mutant with *AtWRKY41* together with the global fitted curves (displayed in red)  
173 obtained from three independent experiments using AFFINImeter software (11). The  $K_d$  was  
174 derived from fitting to a 1:1 binding model.



175

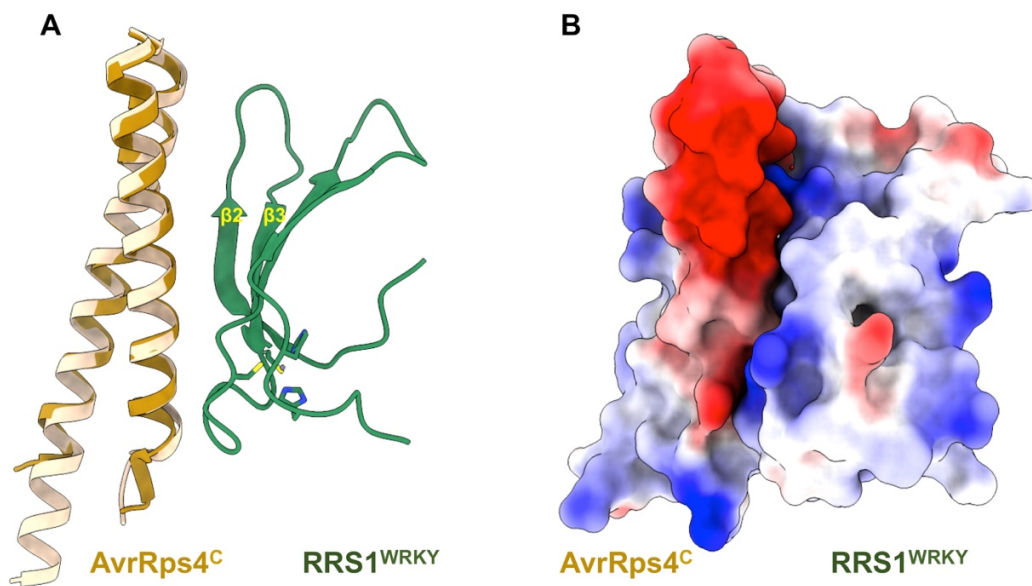

176

177 **Fig. S2.** (A) Overlay of the crystal structure of AvrRps4<sup>C</sup>/RRS1<sup>WRKY</sup> (Dark goldenrod/Dark green)  
178 with the previously published crystal structure of AvrRps4<sup>C</sup> (light goldenrod) (PDB ID: 4B6X).  
179 (B) Electrostatic surface representation of the AvrRps4<sup>C</sup>/RRS1<sup>WRKY</sup> complex highlighting the  
180 electronegative patch in AvrRps4<sup>C</sup> and electropositive patch in RRS1<sup>WRKY</sup> at the interface.

181

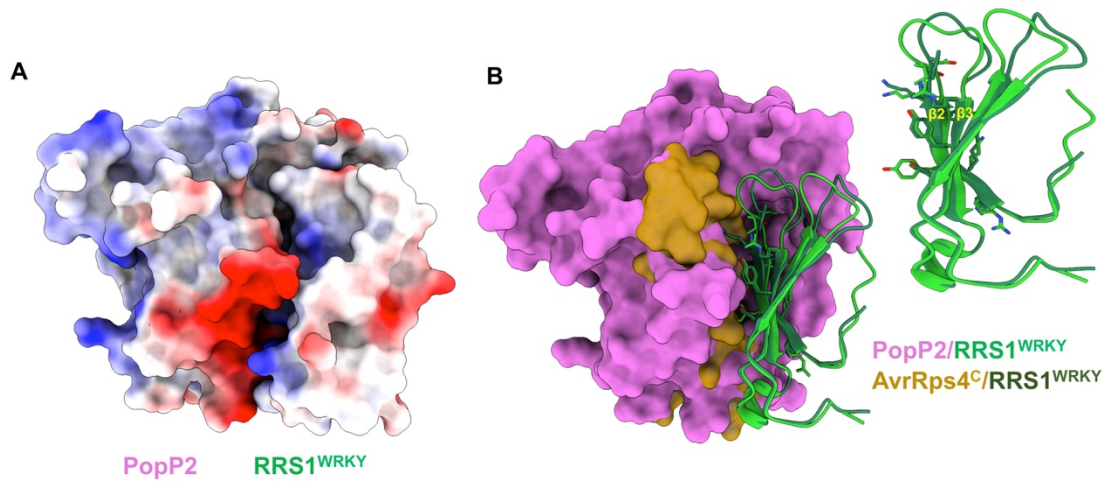

182

183 **Fig. S3.** (A) Electrostatic surface representation of the PopP2/RRS1<sup>WRKY</sup> complex structure (PDB  
184 ID: 5W3X) highlighting the electronegative patch on PopP2 and electropositive patch in  
185 RRS1<sup>WRKY</sup> at the interface. (B) Overlay of the crystal structure of AvrRps4<sup>C</sup>/RRS1<sup>WRKY</sup> (gold  
186 (surface)/green (ribbon) with PopP2/RRS1<sup>WRKY</sup> (PDB ID: 5W3X, purple (surface)/green ribbon)  
187 based on the WRKY domains (left). Comparative view of β2, β3 segments of RRS1<sup>WRKY</sup> mediating  
188 the interaction with AvrRps4<sup>C</sup> (Dark green) and PopP2 (light green) is displayed (right).

189

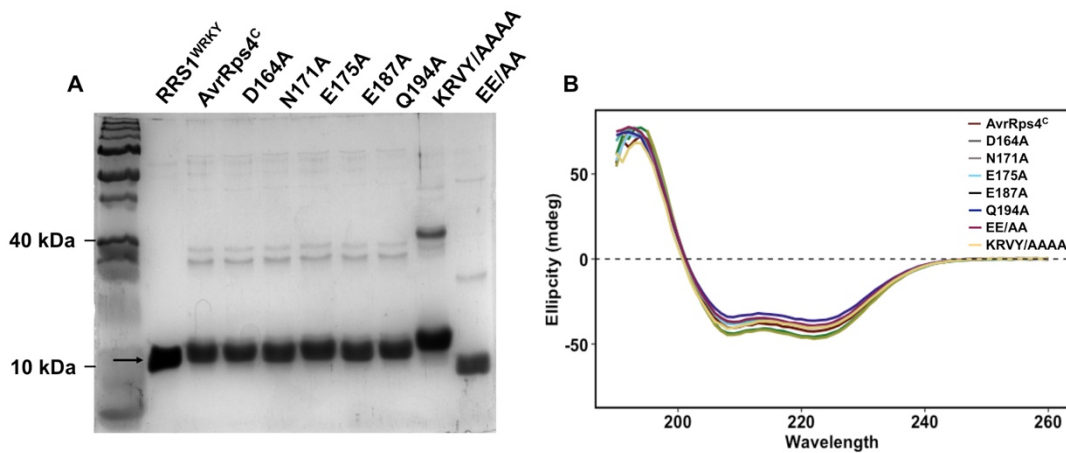

190

191 **Fig. S4.** (A) SDS-PAGE of RRS1<sup>WRKY</sup> and AvrRps4<sup>C</sup> (wild-type and mutants) samples used for in  
192 vitro studies. Arrow indicates the expected size of the purified proteins. (B) CD spectra of the  
193 wild-type AvrRps4<sup>C</sup> and mutants. Far-UV spectra corresponding to the wild-type (brick red),  
194 D164A (dark green), N171A (olive green), E175A (cyan), E187A (bluish green), Q194A (dark  
195 blue), EE/AA (purple) and KRVY/AAAA (coral) are shown. Spectra were taken at 20°C using 0.5  
196 mg/mL of each protein. Each scan represents the average of three independent measurements.

197

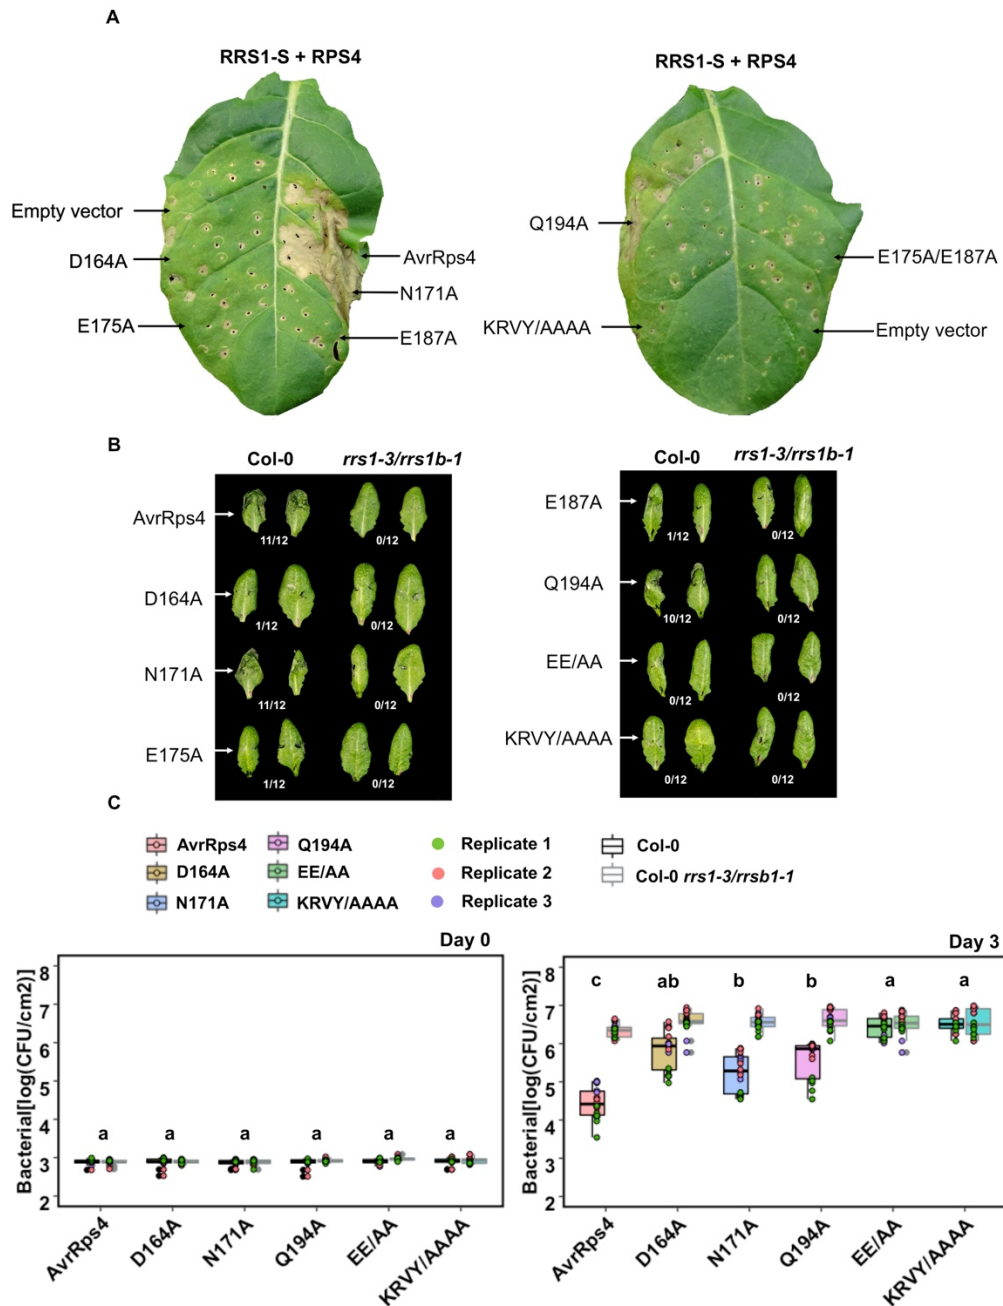

198

199 **Fig. S5.** Structural guided mutants of AvrRps4 confer distinct RRS1-S/RPS4 dependent  
 200 recognition species. (A) Structure-guided mutants in AvrRps4 at the AvrRps4<sup>C</sup>/RRS1<sup>WRKY</sup>  
 201 interface compromise RRS1-S/RPS4 mediated cell death in *N. tabacum*. Representative leaf  
 202 images show RRS1-S/RPS4 mediated cell death response to wild-type and a subset of structure-  
 203 guided mutants of AvrRps4. Agroinfiltration assays were performed in 4-5-week-old *N. tabacum*  
 204 leaves, and cell death was assessed at 4 dpi. The experiment was repeated three times with similar

205 results. (B) Hypersensitive response (HR) assay in Arabidopsis lines using *Pseudomonas*  
206 *fluorescens* (*Pf*) Pf0-1 secreting AvrRps4 wild-type and mutants. Constructs were delivered from  
207 (*Pf*) Pf0-1 into Arabidopsis Col-0 and Col-0 *rrs1-3/rrsb-1* background and HR observed 20 hours  
208 post-infiltration. Fraction refers to number of leaves showing HR of 12 randomly inoculated  
209 leaves. This experiment was repeated at least three times with similar results. (C) In  
210 planta bacterial growth assays with Pto DC3000 secreting AvrRps4 wild-type and mutants on Col-  
211 0 and Col-0 *rrs1-3/rrsb-1* background plants. Bacterial suspensions with  $OD_{600} = 0.001$  were  
212 pressure infiltrated into the leaves of 5-week-old Arabidopsis plants. Values are plotted from three  
213 independent experiments (shown in different colors). Statistical significance of the values was  
214 calculated by one-way ANOVA followed by post-hoc Tukey HSD analysis. Letters above the data  
215 points denotes significant differences ( $P < 0.05$ ). Detailed statistical summary can be found in Table  
216 5.

217

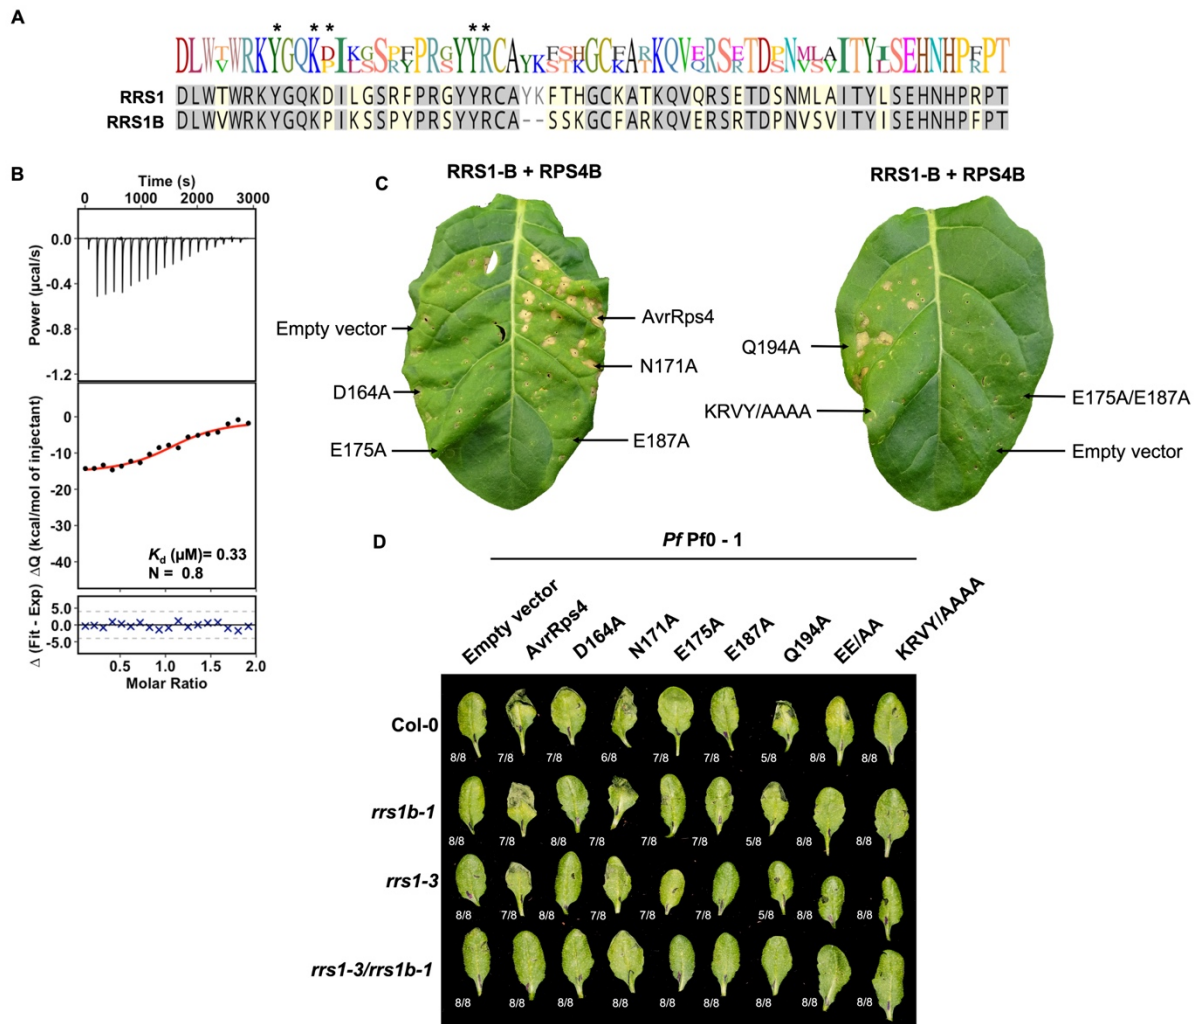

218

219 **Fig. S6.** (A) Protein sequence alignment of the integrated WRKY domains from RRS1 and  
 220 RRS1B. Grey shaded letters show identical residues. Residues at the AvrRps4<sup>C</sup>/RRS1<sup>WRKY</sup>  
 221 interface are marked with asterisk. (B) Isothermal titration calorimetry (ITC) titrations of  
 222 RRS1B<sup>WRKY</sup> with wild-type AvrRps4<sup>C</sup>. Raw processed thermogram after baseline correction and  
 223 noise removal is displayed in the upper panel. The lower panel shows the experimental binding  
 224 isotherm for the interaction together with the global fitted curve (displayed in red) obtained from  
 225 three independent experiments using AFFINImeter software (11). The  $K_d$  was derived from fitting  
 226 to a 1:1 binding model. (C) Structural guided mutants of AvrRps4 at the AvrRps4<sup>C</sup>/RRS1<sup>WRKY</sup>  
 227 interface compromise RRS1B/RPS4B mediated cell death responses in *N. tabacum*.  
 228 Representative leaf images show RRS1B/RPS4B mediated cell death response to AvrRps4 wild-  
 229 type and a subset of structure-guided mutants. Agroinfiltration assays were performed in 4- to 5-

230 week-old *N. tabacum* leaves, and HR phenotypes were assessed at 4 dpi. The experiment was  
231 repeated three times with similar results. (D) Hypersensitive response (HR) assay in  
232 different *Arabidopsis* lines using *Pseudomonas fluorescens* (*Pf*) Pf0-1 secreting AvrRps4 wild-  
233 type and mutants. Constructs were delivered from Pf0-1 into *Arabidopsis* Col-0, Col-0 *rrs1-3*, Col-  
234 0 *rrs1b-1*, Col-0 *rrs1-3/rrs1b-1* background and HR was observed 20 hours post-infiltration.  
235 Fraction refers to number of leaves showing HR of 8 randomly inoculated leaves. This experiment  
236 was repeated twice with similar results.



237

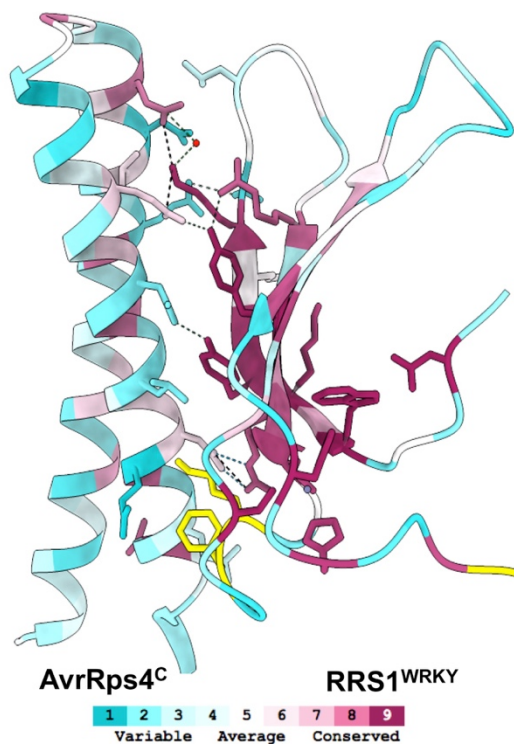

238

239 **Fig. S7.** ConSurf analysis for the interface of the AvrRps4<sup>C</sup>/RRS1<sup>WRKY</sup> complex. The conservation  
240 profiles of residues mediating the interaction of AvrRps4<sup>C</sup> and RRS1<sup>WRKY</sup> as calculated by ConSurf  
241 are mapped upon the structures (15). The complex is shown in cartoon representation and residues  
242 mediating interaction at the interface are highlighted. Each segment of the cartoon has been colored  
243 according to its conservation status ranging from purple (highly conserved) through white  
244 (moderately conserved) to cyan (highly variable). Segments highlighted in yellow are residues for  
245 which a meaningful conservation level could not be derived from the set of homologues sequences  
246 used for the analysis.

247

248 **Table 1. Thermodynamic parameters obtained from ITC experiments**

249

| Cell                  |            | Syringe              |            | T    | $\Delta H$                | $K_d$              |
|-----------------------|------------|----------------------|------------|------|---------------------------|--------------------|
| Contents              | Conc. [mM] | Contents             | Conc. [mM] | [°C] | [kcal mol <sup>-1</sup> ] | [M <sup>-6</sup> ] |
| RRS1 <sup>WRKY</sup>  | 0.02       | AvrRps4 <sup>C</sup> | 0.2        | 25   | -40 ± 0.036               | 0.10               |
| RRS1 <sup>WRKY</sup>  | 0.02       | D164A                | 0.2        | 25   | n.b.                      | n.b.               |
| RRS1 <sup>WRKY</sup>  | 0.02       | N171A                | 0.2        | 25   | -25.42 ± 0.02             | 0.04               |
| RRS1 <sup>WRKY</sup>  | 0.02       | E175A                | 0.2        | 25   | n.b.                      | n.b.               |
| RRS1 <sup>WRKY</sup>  | 0.02       | E187A                | 0.2        | 25   | n.b.                      | n.b.               |
| RRS1 <sup>WRKY</sup>  | 0.02       | Q194A                | 0.2        | 25   | -19.89 ± 0.25             | 0.70               |
| RRS1 <sup>WRKY</sup>  | 0.02       | EE/AA                | 0.2        | 25   | n.b.                      | n.b.               |
| RRS1 <sup>WRKY</sup>  | 0.02       | KRVY/AAAA            | 0.2        | 25   | -19.59 ± 0.02             | 0.03               |
| RRS1B <sup>WRKY</sup> | 0.02       | AvrRps4 <sup>C</sup> | 0.2        | 25   | -14.48 ± 0.01             | 0.33               |
| WRKY41                | 0.02       | AvrRps4 <sup>C</sup> | 0.2        | 25   | -90.54 ± 0.44             | 0.02               |
| WRKY41                | 0.02       | AvrRps4EE/AA         | 0.2        | 25   | n.b.                      | n.b.               |

250 **Table 2. Data collection and refinement statistics for the crystal structure of the**  
251 **AvrRps4<sup>C</sup>/RRS1<sup>WRKY</sup> complex.**

252 \*The highest resolution shell is shown in parenthesis.

253 \*\*As calculated by MolProbity

| <b>Data collection statistics</b>         |                                    |
|-------------------------------------------|------------------------------------|
| Wavelength (Å)                            | 0.912                              |
| Space group                               | <i>P</i> 6 <sub>1</sub> 2 2        |
| Cell dimensions a, b, c (Å)               | 105.61, 105.61, 66.99              |
| Resolution (Å)*                           | 45.77 - 2.65 (2.78 - 2.65)         |
| R <sub>merge</sub> (%)                    | 9.5 (119.0)                        |
| (I)/σ(I)                                  | 17.4 (2.3)                         |
| Completeness (%)                          | 99.9 (100)                         |
| Unique reflections                        | 6800 (888)                         |
| Redundancy                                | 20.8 (21.9)                        |
| CC <sup>1/2</sup>                         | 1.0 (0.9)                          |
| <b>Refinement and model statistics</b>    |                                    |
| Resolution (Å)*                           | 45.77 - 2.65 (2.72 - 2.65)         |
| R <sub>work</sub> / R <sub>free</sub> (%) | 24.5 (35.3) / 28.3 (45.1)          |
| No. atoms                                 | 1020                               |
| Protein                                   | 1016                               |
| Water                                     | 3                                  |
| Mean B value (overall Å <sup>2</sup> )    | 93.11                              |
| rmsd bond lengths (Å)                     | 0.0039                             |
| rmsd bond angles (°)                      | 1.24                               |
| Ramachandran plot (%)**                   |                                    |
| Favoured                                  | 95.9%                              |
| Allowed                                   | 4.1%                               |
| Outliers                                  | 0                                  |
| MolProbity Score                          | 1.89 (98 <sup>th</sup> percentile) |

254

255 **Table 3. Interface summary for AvrRps4<sup>C</sup>/RRS1<sup>WRKY</sup> complex. Interface analysis was**  
 256 **performed using PDBePISA**

257

|                                   | AvrRps4 <sup>C</sup> |         | RRS1 <sup>WRKY</sup> |         |
|-----------------------------------|----------------------|---------|----------------------|---------|
| <b>Number of residues</b>         |                      |         |                      |         |
| Interface                         | 15                   | 24.20%  | 15                   | 23.40%  |
| Surface                           | 62                   | 100.00% | 64                   | 100.00% |
| Total                             | 62                   | 100.00% | 64                   | 100.00% |
| <b>Solvent-accessible area, Å</b> |                      |         |                      |         |
| Interface                         | 589.7                | 12.30%  | 593.9                | 11.90%  |
| Total                             | 4787.5               | 100.00% | 5006.9               | 100.00% |
| <b>Solvation energy, kcal/mol</b> |                      |         |                      |         |
| Isolated structure                | -36.5                | 100.00% | -49.9                | 100.00% |
| Gain on complex formation         | -1.6                 | 4.50%   | -2.4                 | 4.80%   |
| Average gain                      | -0.7                 | 1.90%   | -1                   | 2.00%   |
| P-value                           | 0.401                |         | 0.327                |         |

|                                       |       |
|---------------------------------------|-------|
| <b>Interface area (Å<sup>2</sup>)</b> | 591.8 |
| <b>Solvation energy (kcal/mol)</b>    | -4    |
| <b>Hydrophobic P-value</b>            | 0.362 |
| <b>Hydrogen bonds</b>                 | 10    |
| <b>Salt bridges</b>                   | 7     |
| <b>Disulphide bonds</b>               | 0     |
| <b>CSS</b>                            | 0.1   |

258

259 **Table 4. Interaction summary of the residues mediating the intermolecular contacts**

260 **between AvrRps4<sup>C</sup> and RRS1<sup>WRKY</sup>**

| <b>Hydrogen bonds</b>      |                 |                  |                            |
|----------------------------|-----------------|------------------|----------------------------|
| <b>AvrRps4<sup>C</sup></b> |                 | <b>Dist. [Å]</b> | <b>RRS1<sup>WRKY</sup></b> |
| 1                          | A:ASN 171[ ND2] | 2.68             | B:TYR1218[ OH ]            |
| 2                          | A:ASN 190[ ND2] | 2.93             | B:ASP1222[ O ]             |
| 3                          | A:GLN 194[ NE2] | 2.99             | B:ASP1222[ O ]             |
| 4                          | A:GLU 187[ OE2] | 3.32             | B:LYS1221[ NZ ]            |
| 5                          | A:THR 191[ OG1] | 3.00             | B:LYS1221[ NZ ]            |
| 6                          | A:GLN 194[ OE1] | 2.90             | B:ASP1222[ N ]             |
| 7                          | A:GLU 175[ OE2] | 3.24             | B:ARG1230[ NH2]            |
| 8                          | A:GLU 175[ OE2] | 2.63             | B:TYR1232[ OH ]            |
| 9                          | A:ASP 164[ OD1] | 2.71             | B:ARG1234[ NE ]            |
| 10                         | A:ASP 164[ OD2] | 2.61             | B:ARG1234[ NH2]            |
| <b>Salt bridges</b>        |                 |                  |                            |
| <b>AvrRps4<sup>C</sup></b> |                 | <b>Dist. [Å]</b> | <b>RRS1<sup>WRKY</sup></b> |
| 1                          | A:GLU 187[ OE2] | 3.32             | B:LYS1221[ NZ ]            |
| 2                          | A:GLU 175[ OE1] | 3.50             | B:LYS1221[ NZ ]            |
| 3                          | A:GLU 175[ OE2] | 3.24             | B:ARG1230[ NH2]            |
| 4                          | A:ASP 164[ OD1] | 2.71             | B:ARG1234[ NE ]            |
| 5                          | A:ASP 164[ OD2] | 3.45             | B:ARG1234[ NE ]            |
| 6                          | A:ASP 164[ OD1] | 3.41             | B:ARG1234[ NH2]            |
| 7                          | A:ASP 164[ OD2] | 2.61             | B:ARG1234[ NH2]            |

261

262 **Table 5. Tukey multiple comparisons of means at 95% family-wise confidence level**

263 **Day 3 Col-0**

| <b>Construct</b>  | <b>diff</b> | <b>lower bound</b> | <b>Upper bound</b> | <b>p adj</b> |
|-------------------|-------------|--------------------|--------------------|--------------|
| D164A-AvrRps4     | 0.80269085  | 0.36342384         | 1.24195786         | 0.0000053    |
| EE/AA-AvrRps4     | 1.07949193  | 0.64022492         | 1.51875894         | 0            |
| KRVY/AAAA-AvrRps4 | 1.14645988  | 0.70719287         | 1.58572689         | 0            |
| N171A-AvrRps4     | 0.49868711  | 0.0594201          | 0.93795413         | 0.0159246    |
| Q194A-AvrRps4     | 0.70408364  | 0.26481663         | 1.14335065         | 0.0001012    |
| EE/AA-D164A       | 0.27680107  | -0.1624659         | 0.71606808         | 0.4599963    |
| KRVY/AAAA-D164A   | 0.34376903  | -0.095498          | 0.78303604         | 0.2192971    |
| N171A-D164A       | -0.3040037  | -0.7432708         | 0.13526327         | 0.3512228    |
| Q194A-D164A       | -0.0986072  | -0.5378742         | 0.3406598          | 0.9873355    |
| KRVY/AAAA-EE/AA   | 0.06696796  | -0.3722991         | 0.50623497         | 0.9979272    |
| N171A-EE/AA       | -0.5808048  | -1.0200718         | -0.1415378         | 0.0025517    |
| Q194A-EE/AA       | -0.3754083  | -0.8146753         | 0.06385872         | 0.1416124    |
| N171A-KRVY/AAAA   | -0.6477728  | -1.0870398         | -0.2085058         | 0.0004724    |
| Q194A-KRVY/AAAA   | -0.4423762  | -0.8816433         | -0.0031092         | 0.0472852    |
| Q194A-N171A       | 0.20539652  | -0.2338705         | 0.64466353         | 0.759545     |

264

265 **Day 3 Ws-2**

| <b>Construct</b>  | <b>diff</b> | <b>Lower bound</b> | <b>Upper bound</b> | <b>p adj</b> |
|-------------------|-------------|--------------------|--------------------|--------------|
| D164A-AvrRps4     | 1.26186508  | 0.7822084          | 1.74152177         | 0            |
| EE/AA-AvrRps4     | 1.2783785   | 0.7987218          | 1.75803519         | 0            |
| KRVY/AAAA-AvrRps4 | 1.12588572  | 0.646229           | 1.60554241         | 0            |
| N171A-AvrRps4     | 0.492187    | 0.0125303          | 0.97184369         | 0.0405978    |
| Q194A-AvrRps4     | 0.70761177  | 0.2279551          | 1.18726846         | 0.0004693    |
| EE/AA-D164A       | 0.01651342  | -0.4631433         | 0.49617011         | 0.9999987    |
| KRVY/AAAA-D164A   | -0.1359794  | -0.6156361         | 0.34367733         | 0.9644636    |
| N171A-D164A       | -0.7696781  | -1.2493348         | -0.2900214         | 0.000099     |
| Q194A-D164A       | -0.5542533  | -1.03391           | -0.0745966         | 0.0132372    |
| KRVY/AAAA-EE/AA   | -0.1524928  | -0.6321495         | 0.32716391         | 0.9425012    |
| N171A-EE/AA       | -0.7861915  | -1.2658482         | -0.3065348         | 0.0000643    |
| Q194A-EE/AA       | -0.5707667  | -1.0504234         | -0.09111           | 0.0095929    |
| N171A-KRVY/AAAA   | -0.6336987  | -1.1133554         | -0.154042          | 0.0025804    |
| Q194A-KRVY/AAAA   | -0.418274   | -0.8979306         | 0.06138275         | 0.1263936    |
| Q194A-N171A       | 0.21542477  | -0.2642319         | 0.69508146         | 0.7893133    |

266



267 **References**

268

- 269 1. L. E. Bird, High throughput construction and small scale expression screening of multi-  
270 tag vectors in *Escherichia coli*. *Methods* **55**, 29-37 (2011).
- 271 2. L. Potterton *et al.*, CCP4i2: the new graphical user interface to the CCP4 program suite.  
272 *Acta Crystallographica Section D* **74**, 68-84 (2018).
- 273 3. A. J. McCoy *et al.*, Phaser crystallographic software. *Journal of Applied Crystallography*  
274 **40**, 658-674 (2007).
- 275 4. P. Emsley, K. Cowtan, Coot: model-building tools for molecular graphics. *Acta Crystallogr*  
276 *D Biol Crystallogr* **60**, 2126-2132 (2004).
- 277 5. T. I. Croll, ISOLDE: a physically realistic environment for model building into low-  
278 resolution electron-density maps. *Acta Crystallogr D Struct Biol* **74**, 519-530 (2018).
- 279 6. G. N. Murshudov *et al.*, REFMAC5 for the refinement of macromolecular crystal  
280 structures. *Acta Crystallographica Section D* **67**, 355-367 (2011).
- 281 7. C. J. Williams *et al.*, MolProbity: More and better reference data for improved all-atom  
282 structure validation. *Protein Sci* **27**, 293-315 (2018).
- 283 8. G. Battle (2016) PDBePISA : Identifying and interpreting the likely biological assemblies  
284 of a protein structure.
- 285 9. E. F. Pettersen *et al.*, UCSF ChimeraX: Structure visualization for researchers, educators,  
286 and developers. *Protein Sci* **30**, 70-82 (2021).
- 287 10. H. Wickham, ggplot2-Elegant Graphics for Data Analysis. Springer International  
288 Publishing. *Cham, Switzerland* (2016).
- 289 11. Á. Piñeiro *et al.*, AFFINImeter: A software to analyze molecular recognition processes  
290 from experimental data. *Analytical Biochemistry* **577**, 117-134 (2019).
- 291 12. Panagiotis F. Sarris *et al.*, A Plant Immune Receptor Detects Pathogen Effectors that  
292 Target WRKY Transcription Factors. *Cell* **161**, 1089-1100 (2015).
- 293 13. Y. Ma *et al.*, Distinct modes of derepression of an *Arabidopsis* immune receptor  
294 complex by two different bacterial effectors. *Proceedings of the*  
295 *National Academy of Sciences* **115**, 10218 (2018).
- 296 14. K. H. Sohn, R. K. Hughes, S. J. Piquerez, J. D. G. Jones, M. J. Banfield, Distinct regions of  
297 the *Pseudomonas syringae* coiled-coil effector AvrRps4 are  
298 required for activation of immunity. *Proceedings of the National Academy of Sciences*  
299 **109**, 16371 (2012).
- 300 15. H. Ashkenazy *et al.*, ConSurf 2016: an improved methodology to estimate and visualize  
301 evolutionary conservation in macromolecules. *Nucleic Acids Research* **44**, W344-W350  
302 (2016).
- 303
